# Supplementary material for: Pot- and atom-economic synthesis of oligomeric non-fullerene acceptors via C–H direct arylation
Source: Royal Society of Chemistry journal article supplement (doi:10.1039/d2py00139j), 2022-01-01
Supplement: d2py00139j1.pdf [file d2py00139j1.pdf]

## Pot- and atom-economic synthesis of oligomeric non-fullerene acceptors via C–H direct arylation

Li-Hong Wang,<sup>‡a</sup> Xian-Jie Chen,<sup>‡b</sup> Dong-Nai Ye,<sup>a</sup> Hui Liu,<sup>a</sup> Yan Chen,<sup>a</sup> Ai-Guo Zhong,<sup>c</sup> Chang-Zhi Li,<sup>\*b</sup> and Shi-Yong Liu<sup>\*a</sup>

<sup>a</sup> College of Materials, Metallurgical and Chemistry, Jiangxi University of Science and Technology, Ganzhou 341000, P. R. China

<sup>b</sup> Department of Polymer Science and Engineering, Zhejiang University, Hangzhou 310027 (P. R. China)

<sup>c</sup> Department of Pharmacy & Chemistry, Taizhou University, 317000, PR China

### Corresponding author:

\* E-mail: chelsy@jxust.edu.cn (S. -Y. Liu), czli@zju.edu.cn (C.-Z. Li)

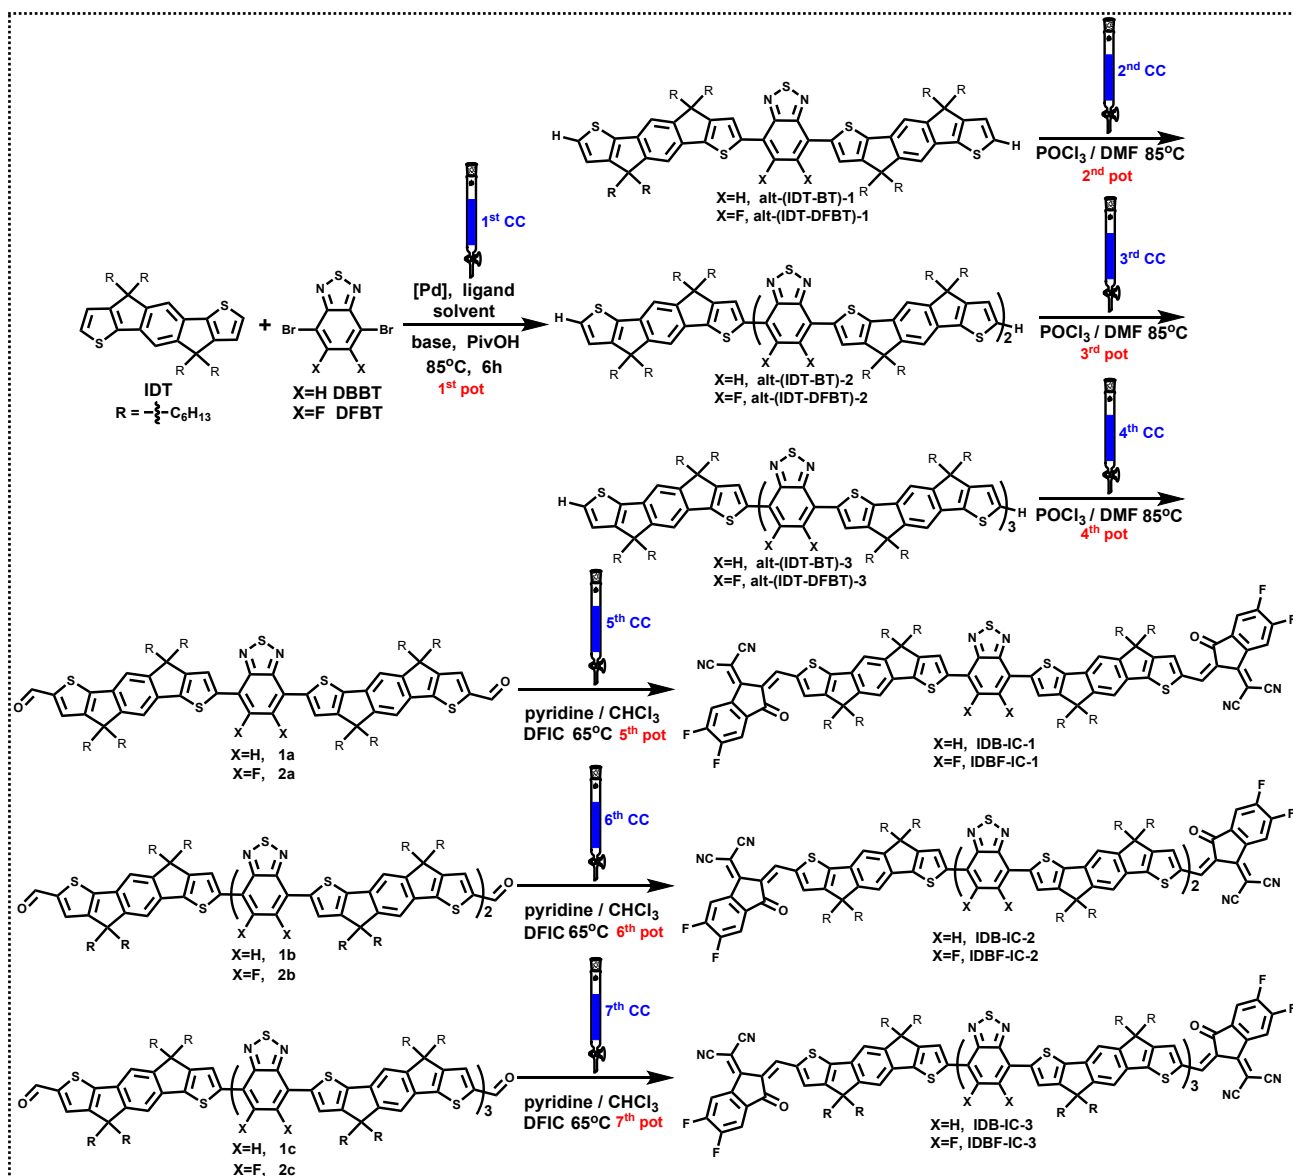

**Scheme S1** Synthesis of IDB-IC-*n* or IDBF-IC-*n* (*n* = 1~3) via the conventional one-by-one strategy.

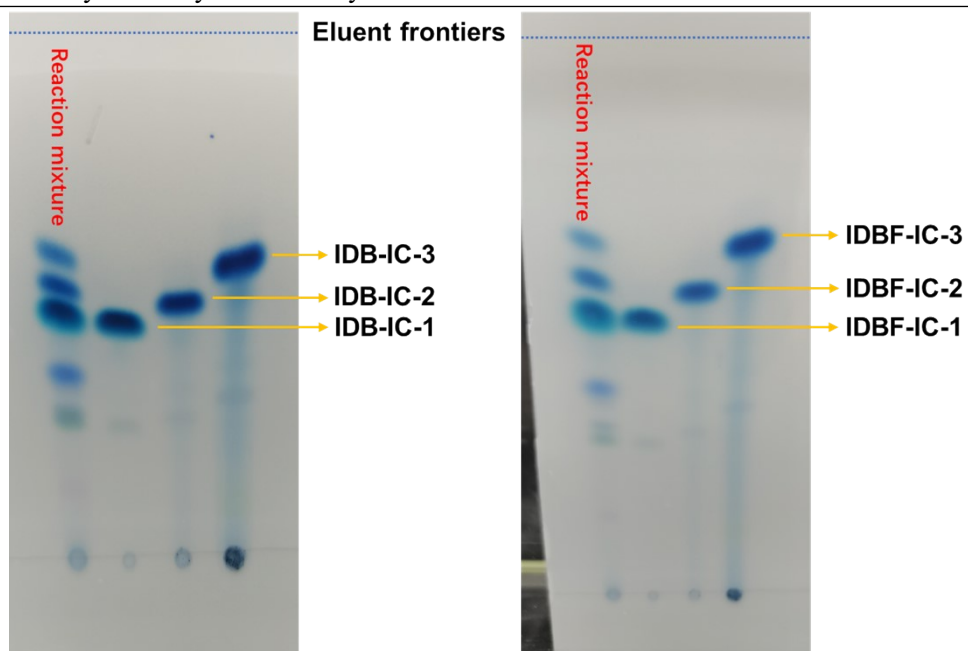

**Fig. S1** Thin-layer chromatography (TLC) analysis for the reaction mixture of last pot of Knoevenagel reaction in **Scheme 1** [The starting spots on each TLC plate involved the reaction mixture and their corresponding purified NFAs, i.e., IDB-IC-n (left plate) and IDBF-IC-n (right plate) using  $\text{CH}_2\text{Cl}_2$ :hexane (1.2:1, v/v) as developing solvent].

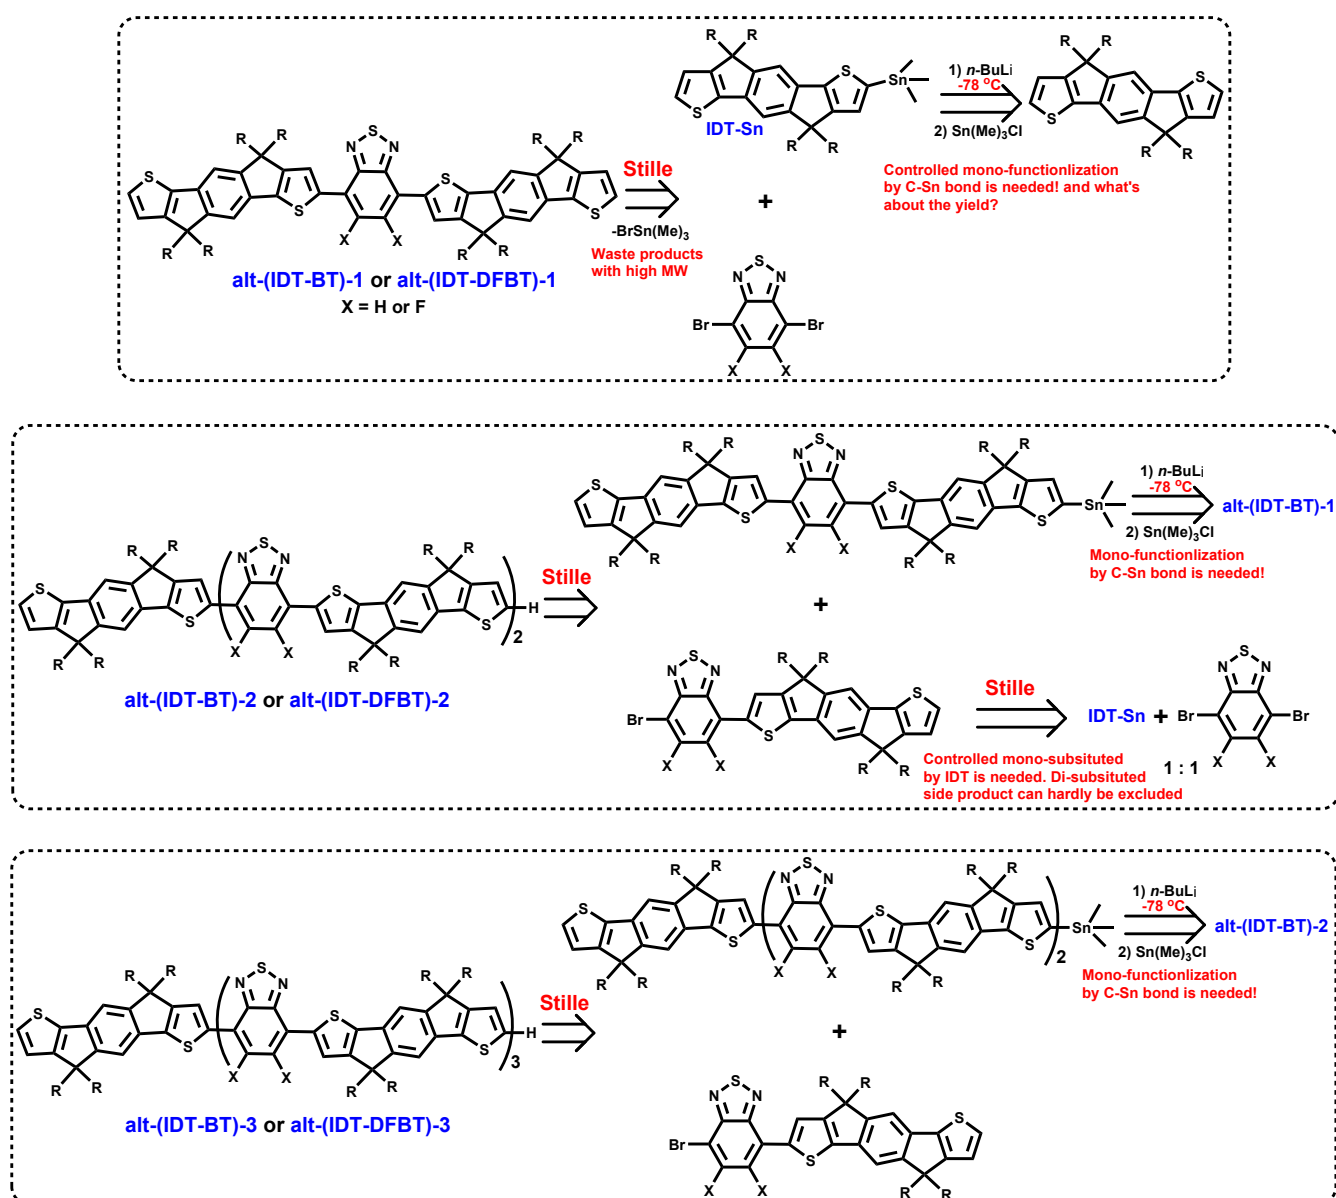

**Scheme S2** Retrosynthetic analysis of alt-(IDT-BT)-*n* or alt-(IDT-DFBT)-*n* (*n* = 1~3) via classical Stille coupling reaction. [Compared to C–H oligomerization we developed, much more synthetic steps and harsh reaction conditions (for highly active BuLi) will be involved if Stille coupling is employed instead, including controlled mono-functionalization of intermediates by C–Sn bond, low reaction temperature (-78 °C) with anhydrous condition, and controlled mono-substituted of DBTT (or DFBT) by IDT.]

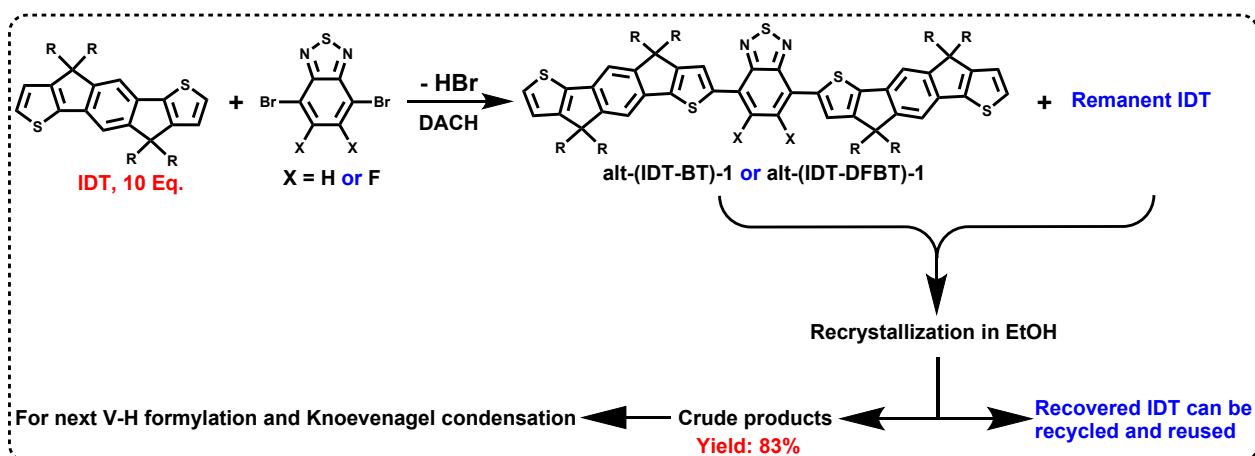

**Scheme S3** Non-equimolar C–H arylation coupling (10 : 1) between IDT and DBBT (or DFBT). [After completing reaction, the mixtures were subjected to recrystallization in EtOH to separate products, *i.e.*, alt-(IDT-BT)-1 or alt-(IDT-DFBT)-1, and the excessive remanent IDT can be recovered and reused.]

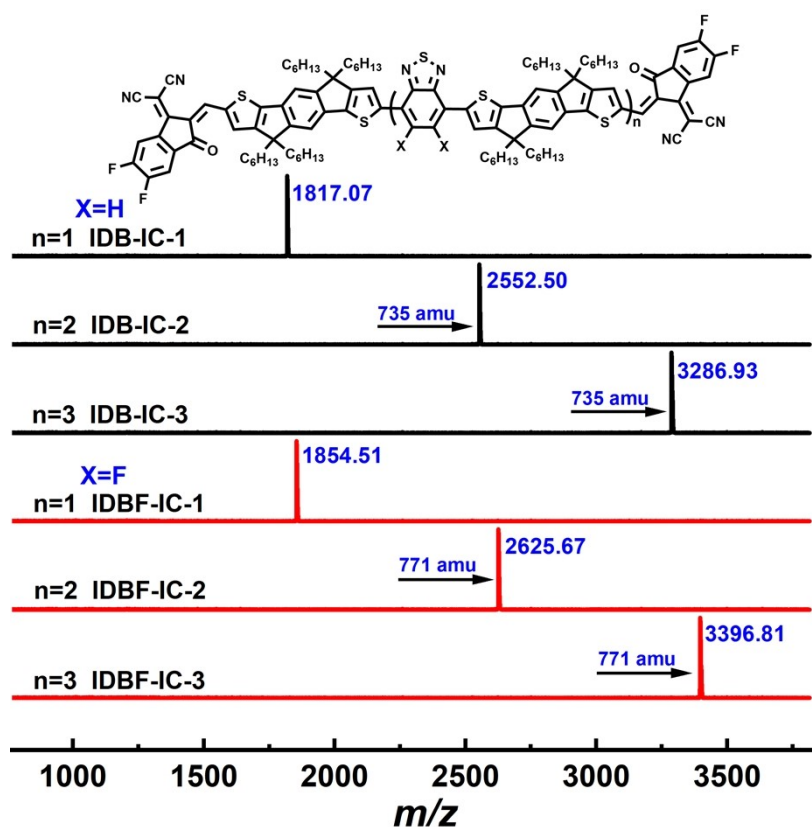

**Fig. S2** Molecular ion peaks of MALDI-TOF MS spectra of IDB-IC-n and IDBF-IC-n (n=1~3)

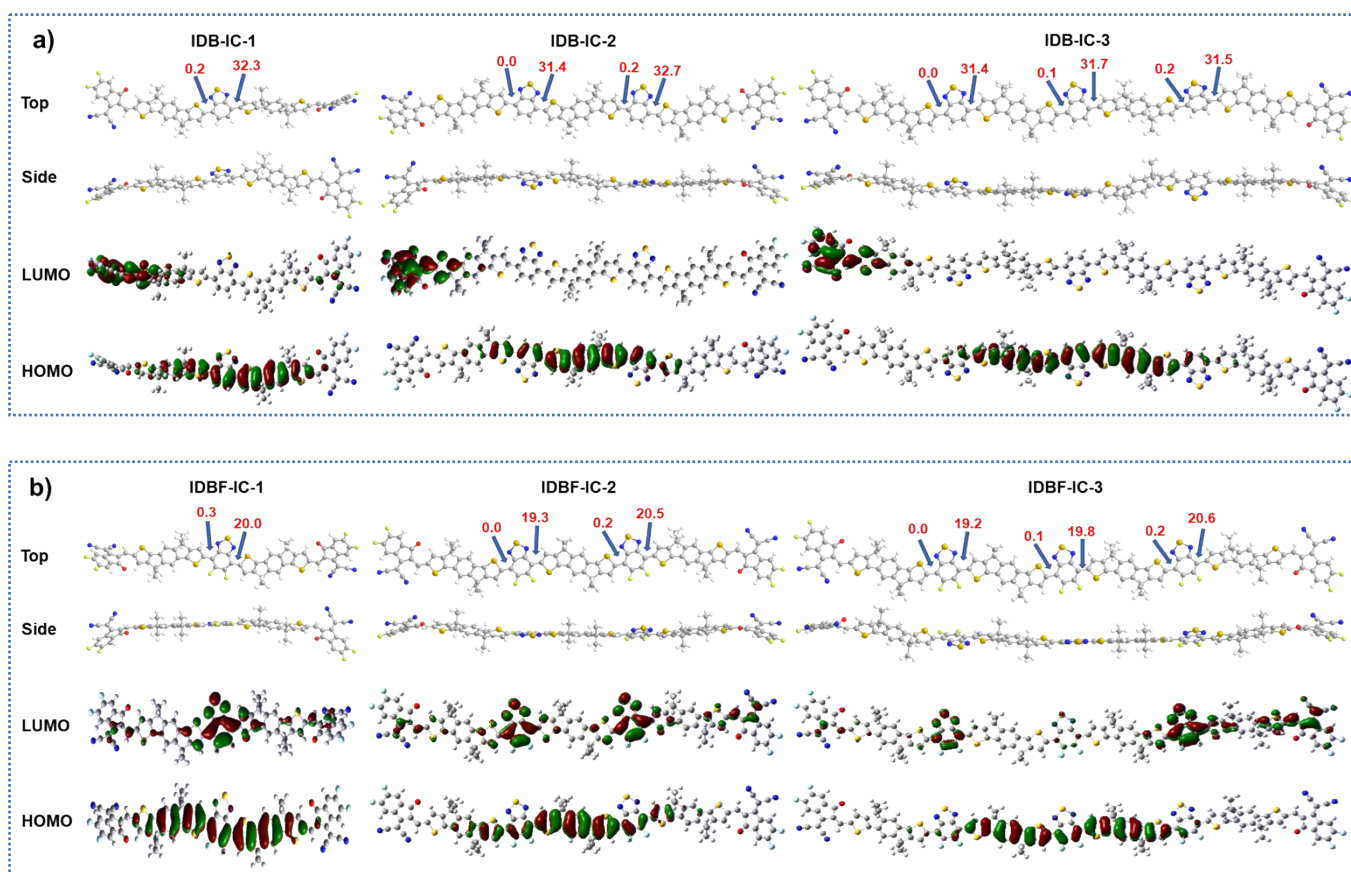

**Fig. S3** Top and side views of molecular geometries and optimized geometries calculated by using density functional theory (Alkyl substituents on the IDT units of the acceptors are replaced by methyl groups for simplifying the calculation), (a) IDB-IC-n(n=1~3); (b) IDBF-IC-n(n=1~3).

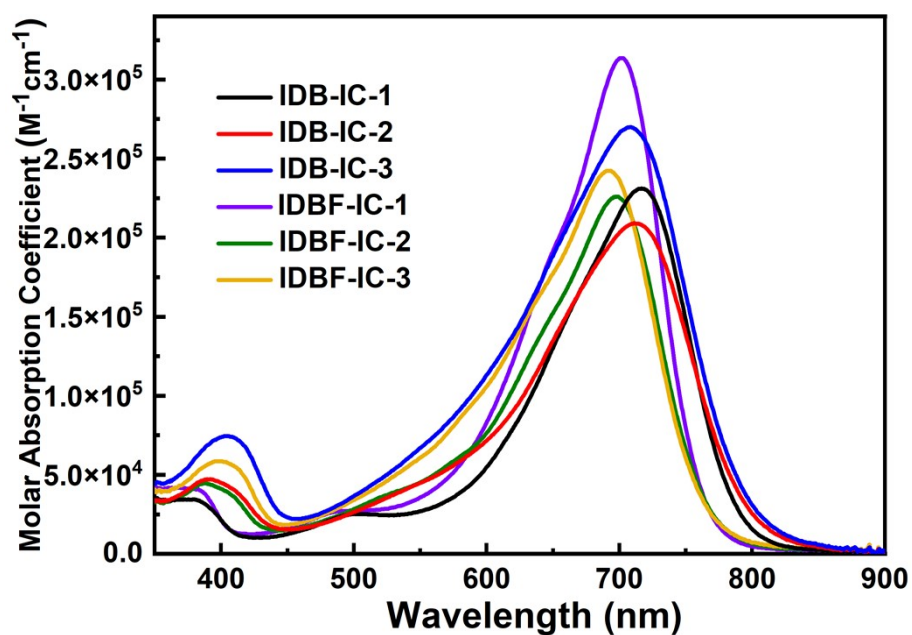

Fig. S4 UV-vis spectra of IDB(F)-IC-n (n=1~3) in chloroform solution in  $10^{-6}$  M.

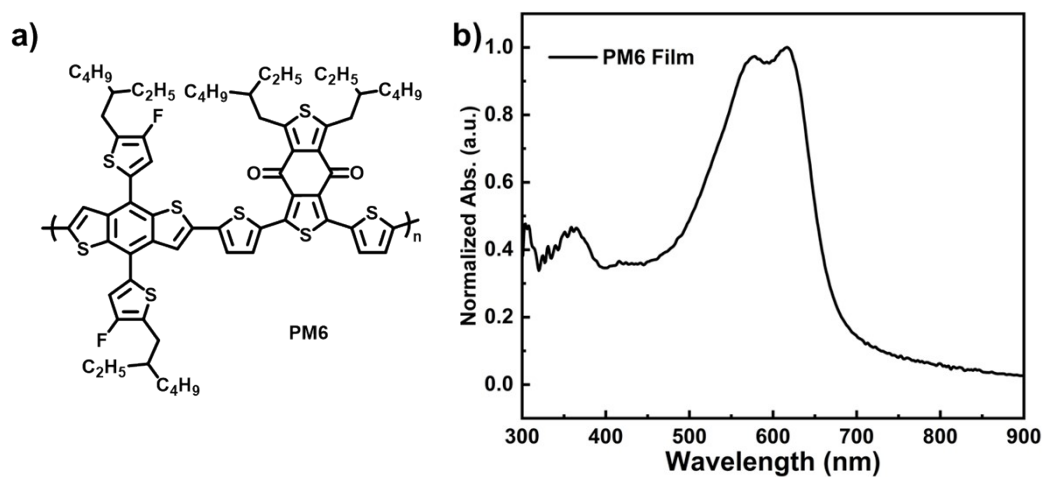

Fig. S5 Molecular structure of PM6 (a), and UV-vis absorption (c) of PM6 thin film.

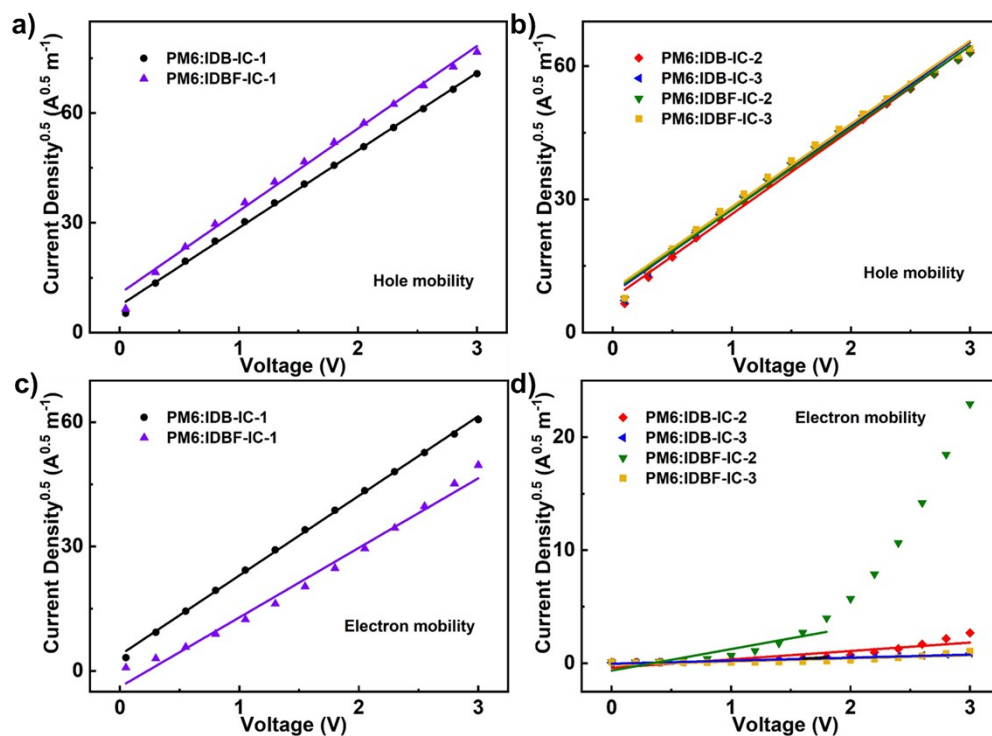

**Fig. S6** (a) hole mobility measurement of IDB(F)-IC-1 optimized OPVs devices by SCLC; (b) hole mobility measurement of IDB(F)-IC-2 and 3 optimized OPVs devices by SCLC; (c) electron mobility measurement of IDB(F)-IC-1 optimized OPVs devices by SCLC; (d) electron mobility measurement of IDB(F)-IC-2 and 3 optimized OPVs devices by SCLC.



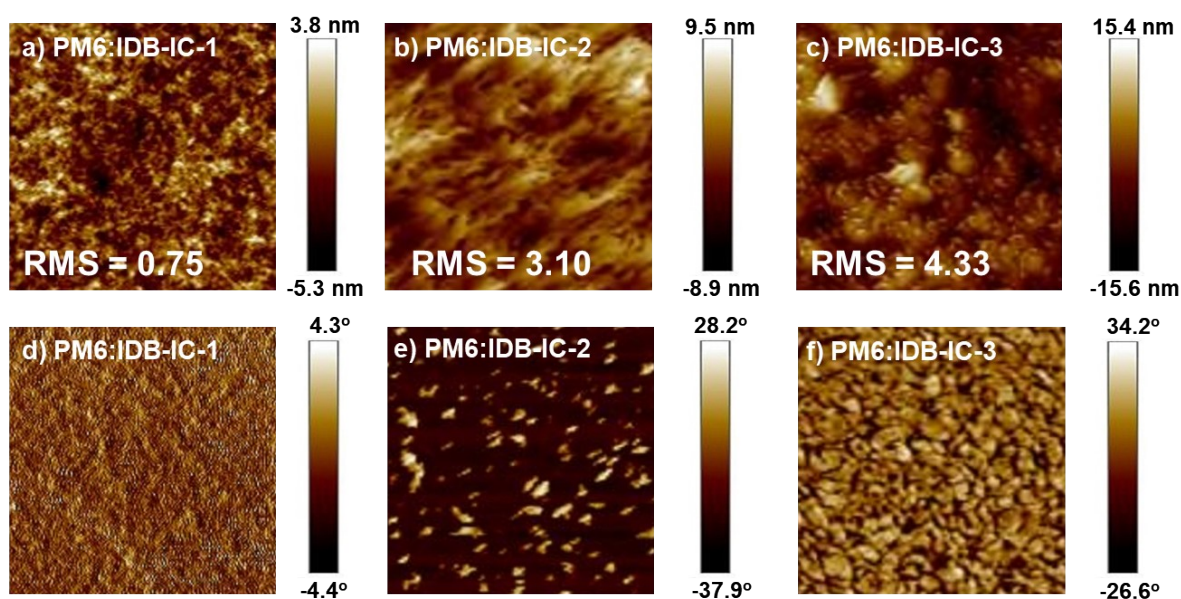

**Fig. S7** AFM height (a, b, c) and phase (d, e, f) images of blends PM6:IDB-IC- $n$  ( $n=1\sim3$ ).

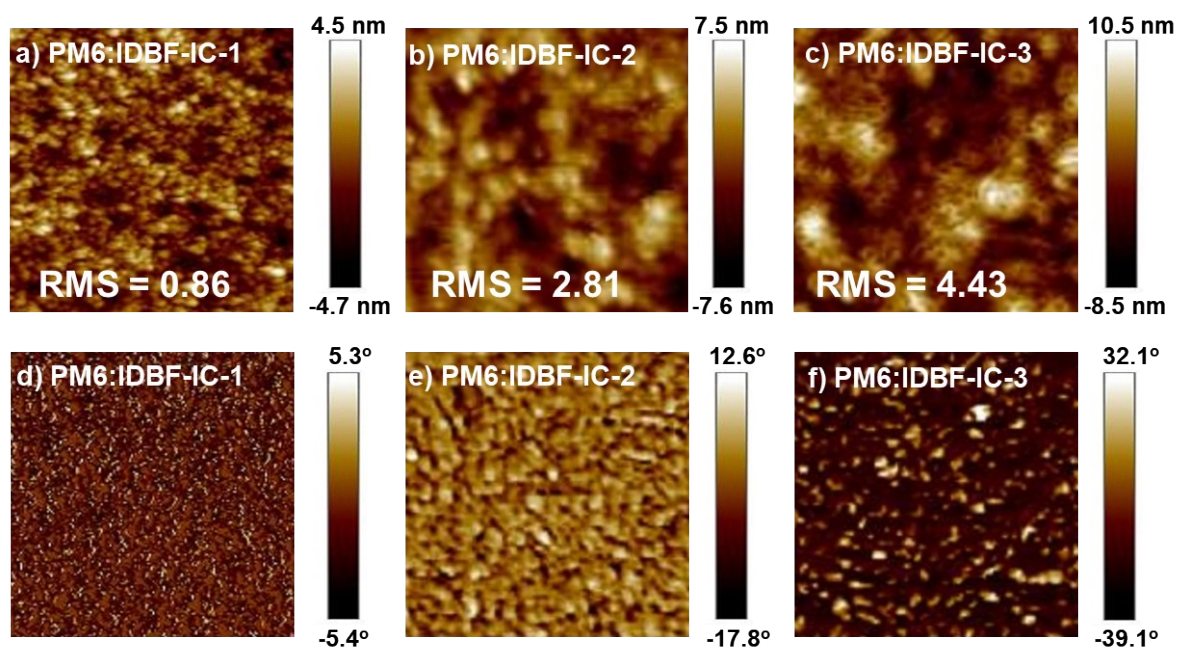

**Fig. S8** AFM height (a, b, c) and phase (d, e, f) images of blends PM6:IDBF-IC- $n$  ( $n=1\sim3$ ).

**Table S1** Photovoltaic parameters of OSCs based on PM6:IDB-IC-1 blended films under the illumination of AM 1.5 G, 100 mW cm<sup>-2</sup>.

| PM6:IDB-IC-1          | V <sub>oc</sub> V | J <sub>sc</sub> mA cm <sup>-2</sup> | FF %         | PCE %        |
|-----------------------|-------------------|-------------------------------------|--------------|--------------|
| 1:1 (w/o)             | 0.905             | 12.78                               | 63.36        | 7.36         |
| 1:1 (TA)              | 0.900             | 14.32                               | 68.46        | 8.86         |
| 1:1.2 (w/o)           | 0.901             | 15.09                               | 66.37        | 9.11         |
| <b>1:1.2 (TA)</b>     | <b>0.892</b>      | <b>16.13 (15.53)</b>                | <b>71.02</b> | <b>10.32</b> |
| 1:1.2 (0.5% DIO + TA) | 0.872             | 16.03                               | 69.35        | 9.79         |
| 1:1.2 (0.5% CN + TA)  | 0.878             | 15.74                               | 68.94        | 9.56         |
| 1:1.4 (w/o)           | 0.892             | 15.18                               | 63.68        | 8.66         |
| 1:1.4 (TA)            | 0.884             | 15.66                               | 64.29        | 8.96         |

**Table. S2.** Photovoltaic parameters of OSCs based on PM6:IDBF-IC-1 blended films under the illumination of AM 1.5 G, 100 mW cm<sup>-2</sup>

| PM6:IDBF-IC-1       | V <sub>oc</sub> V | J <sub>sc</sub> mA cm <sup>-2</sup> | FF %         | PCE %        |
|---------------------|-------------------|-------------------------------------|--------------|--------------|
| 1.2:1 (w/o)         | 0.894             | 18.02                               | 64.16        | 10.37        |
| 1.2:1 (TA)          | 0.893             | 18.69                               | 64.58        | 10.81        |
| 1:1 (w/o)           | 0.905             | 18.25                               | 66.00        | 11.13        |
| <b>1:1 (TA)</b>     | <b>0.901</b>      | <b>19.17(18.58)</b>                 | <b>69.50</b> | <b>12.12</b> |
| 1:1 (0.5% DIO + TA) | 0.886             | 19.45                               | 66.61        | 11.51        |
| 1:1 (0.5% CN + TA)  | 0.883             | 17.65                               | 61.24        | 9.57         |
| 1:1.2 (w/o)         | 0.920             | 18.14                               | 66.62        | 11.23        |
| 1:1.2 (TA)          | 0.894             | 18.97                               | 71.02        | 11.44        |
| 1:1.4 (w/o)         | 0.920             | 16.94                               | 68.52        | 10.79        |
| 1:1.4 (TA)          | 0.901             | 17.42                               | 69.40        | 11.00        |

**Table S3** Hole and electron mobilities of PDFCs measured in single carrier diodes by fitting of SCLC model.

| <b>Blends</b> | $\mu_h (10^{-4} \text{ cm}^2 \text{ V}^{-1} \text{ s}^{-1})$ | $\mu_e (10^{-4} \text{ cm}^2 \text{ V}^{-1} \text{ s}^{-1})$ |
|---------------|--------------------------------------------------------------|--------------------------------------------------------------|
| PM6:IDB-IC-1  | 1.51                                                         | 1.23                                                         |
| PM6:IDB-IC-2  | 1.20                                                         | 0.00188                                                      |
| PM6:IDB-IC-3  | 1.19                                                         | 0.000244                                                     |
| PM6:IDBF-IC-1 | 1.70                                                         | 0.94                                                         |
| PM6:IDBF-IC-2 | 1.14                                                         | 0.0121                                                       |
| PM6:IDBF-IC-3 | 1.17                                                         | 0.000262                                                     |

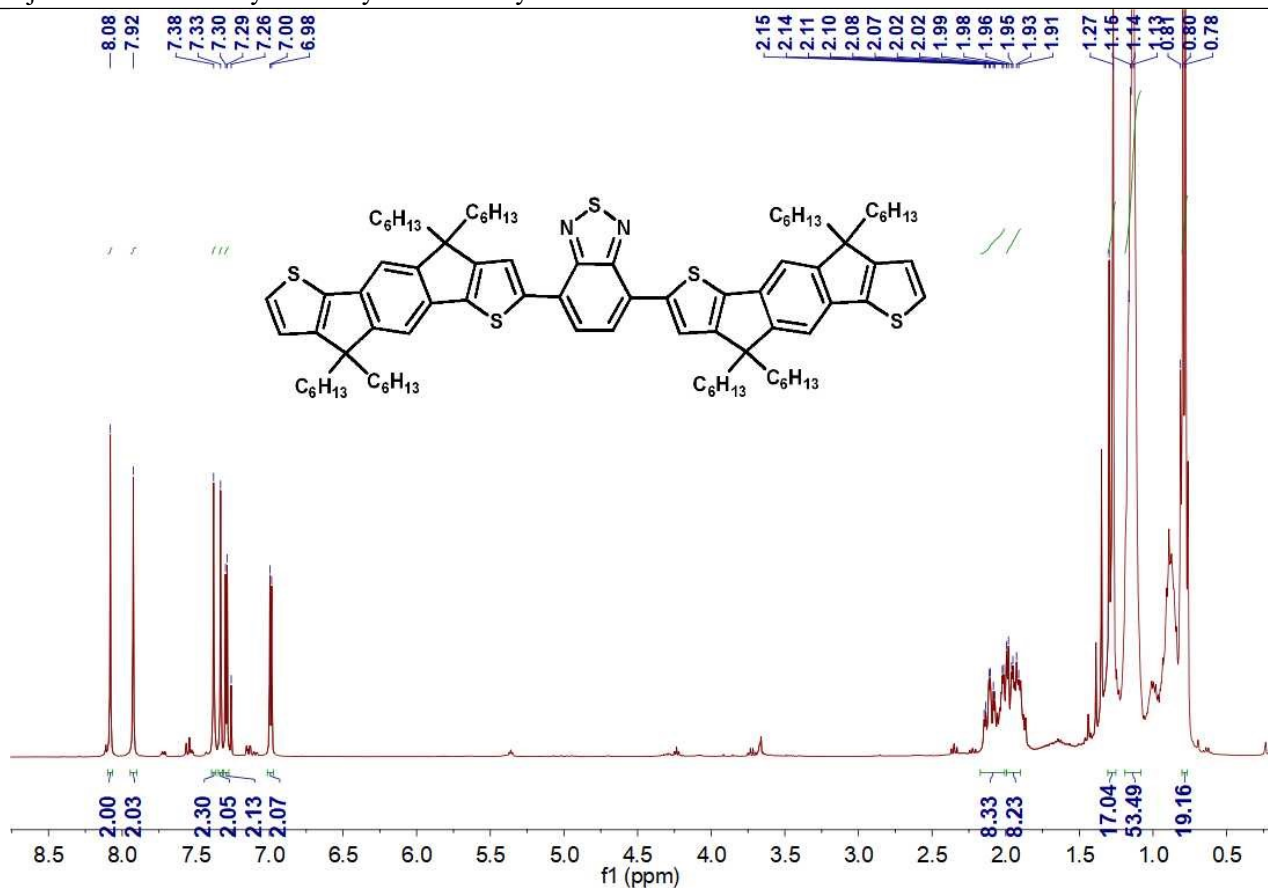

Fig. S9  $^1\text{H}$  NMR spectra of alt-(IDT-BT)-1 in  $\text{CDCl}_3$ .

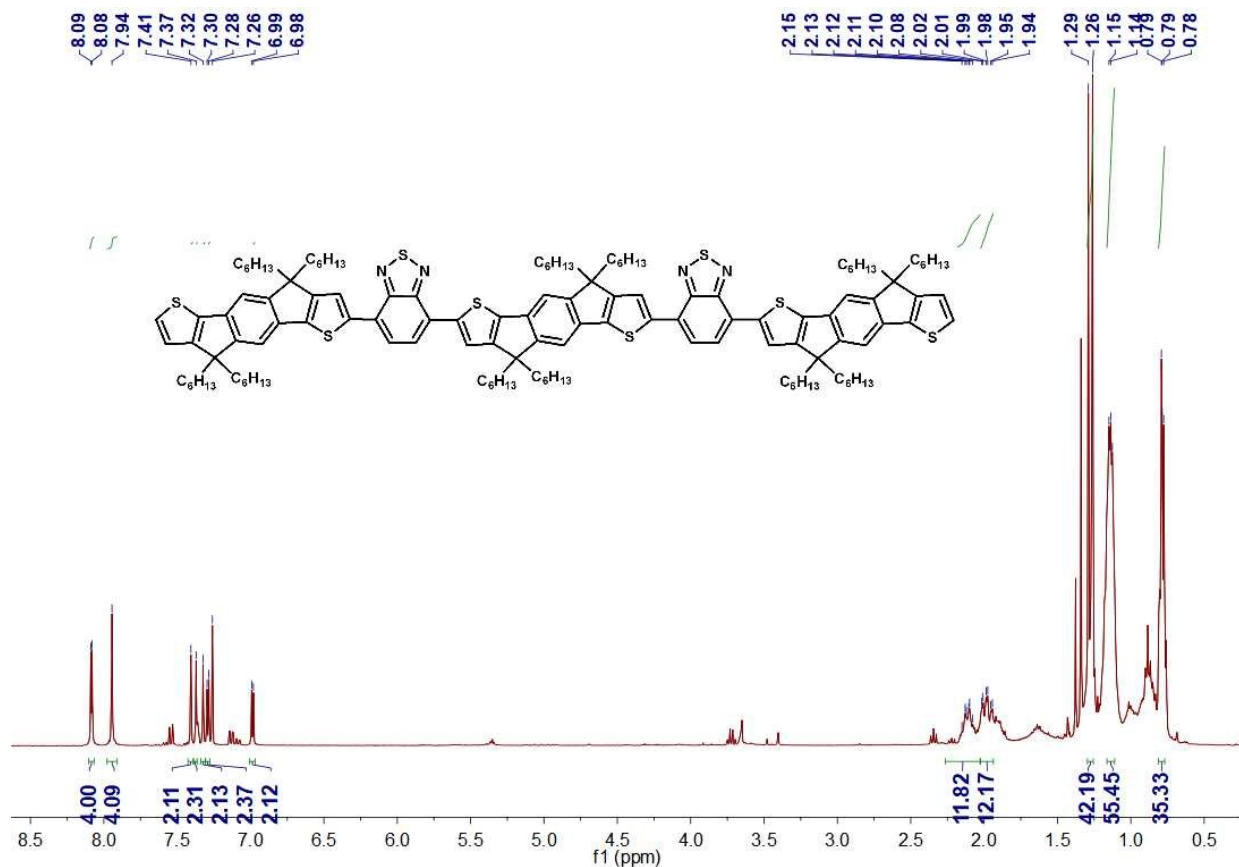

Fig. S10  $^1\text{H}$  NMR spectra of alt-(IDT-BT)-2 in  $\text{CDCl}_3$ .

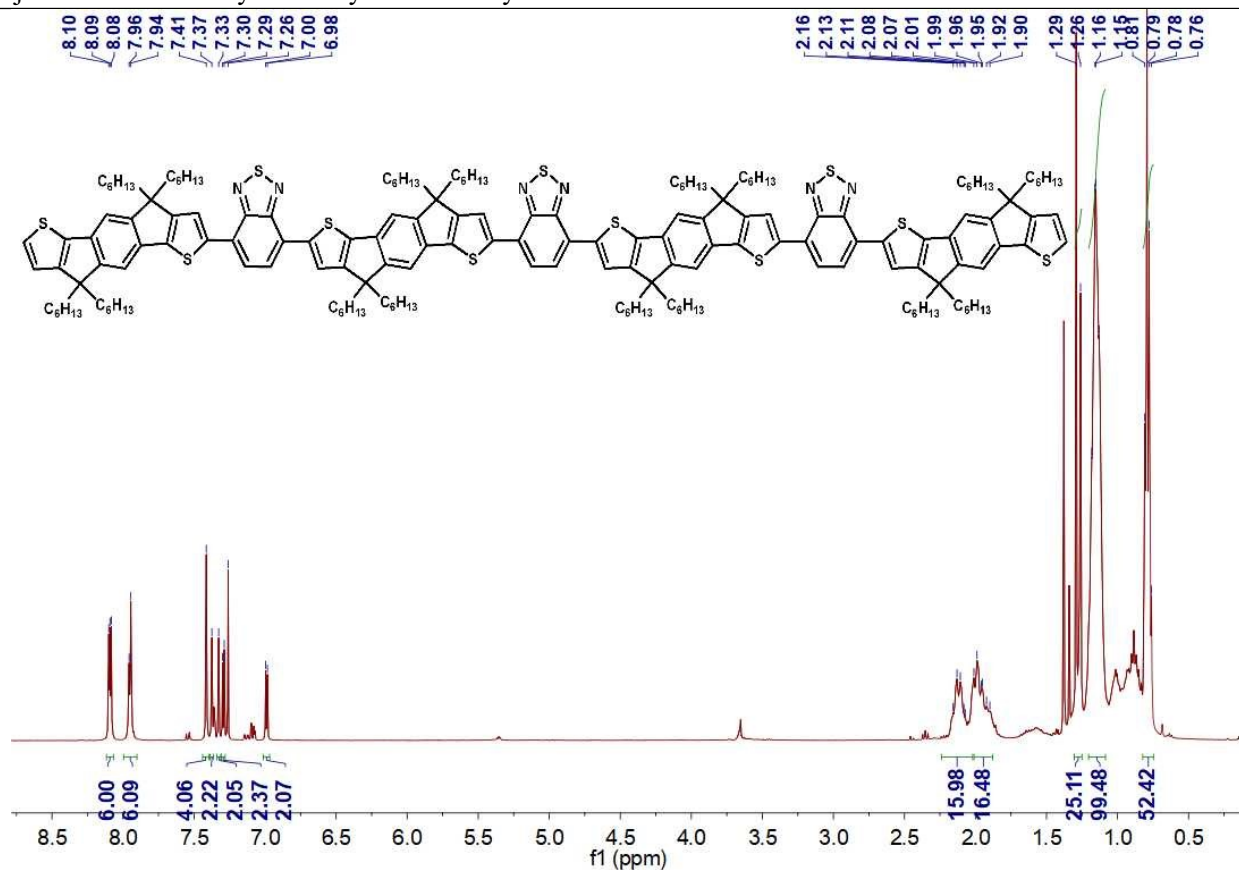

Fig. S11 <sup>1</sup>H NMR spectra of alt-(IDT-BT)-3 in CDCl<sub>3</sub>.

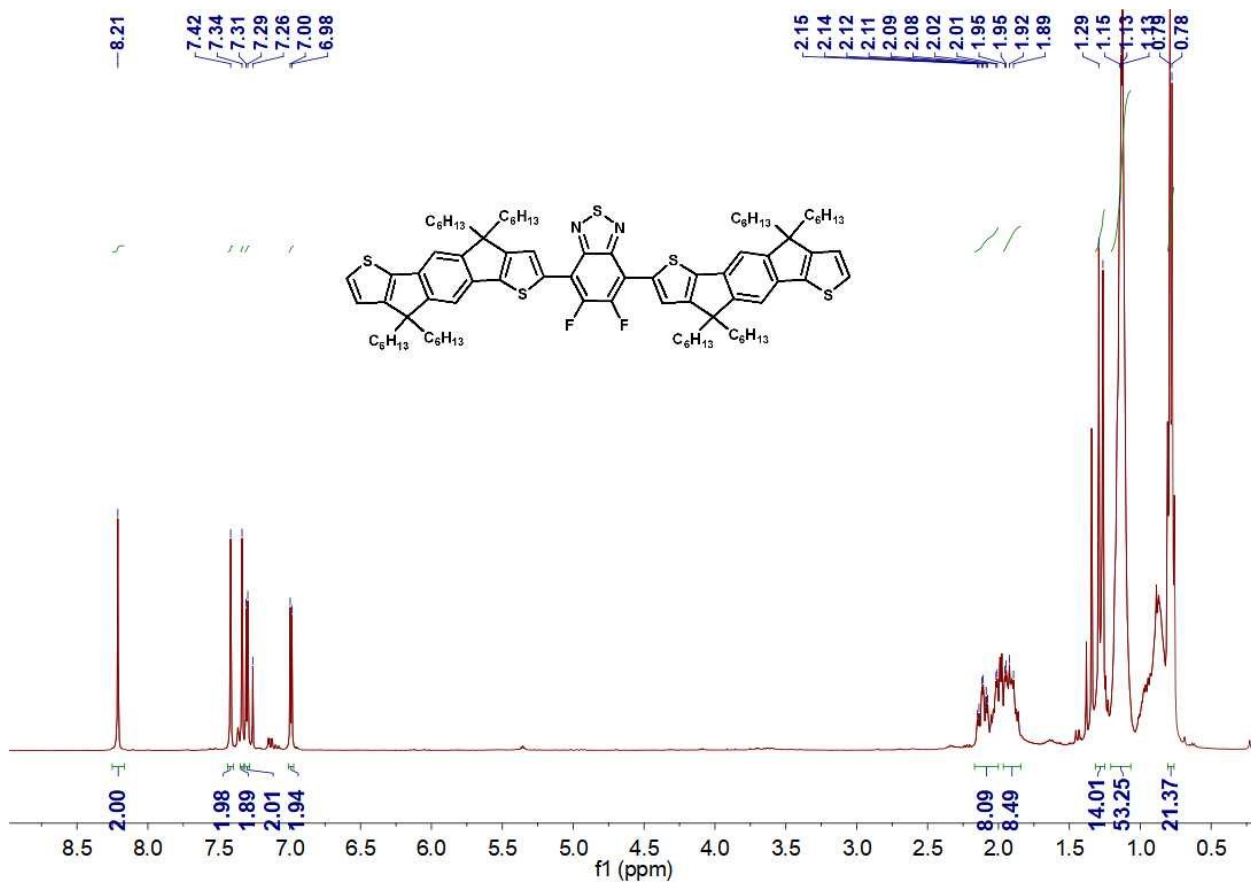

Fig. S12 <sup>1</sup>H NMR spectra of alt-(IDT-DFBT)-1 in CDCl<sub>3</sub>.

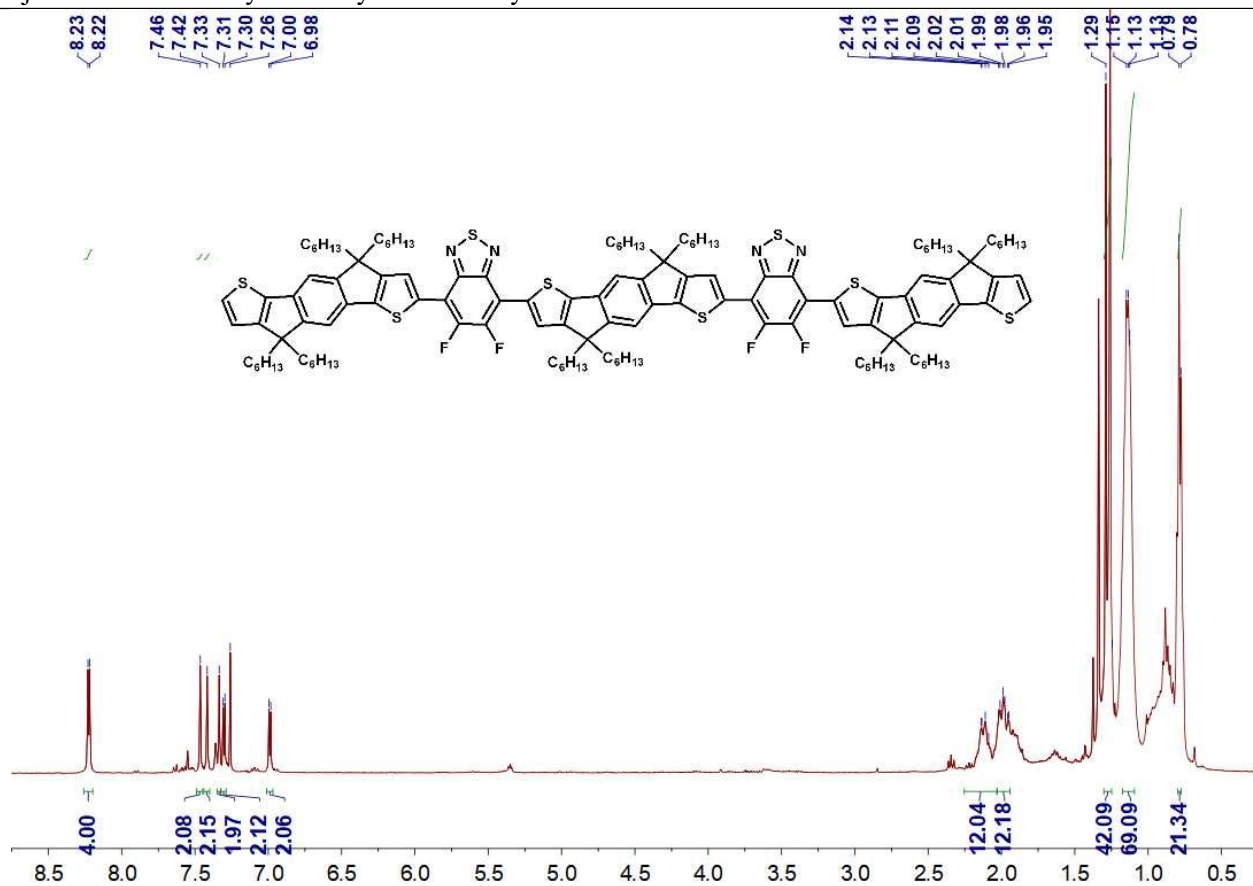

Fig. S13 <sup>1</sup>H NMR spectra of alt-(IDT-DFBT)-2 in CDCl<sub>3</sub>.

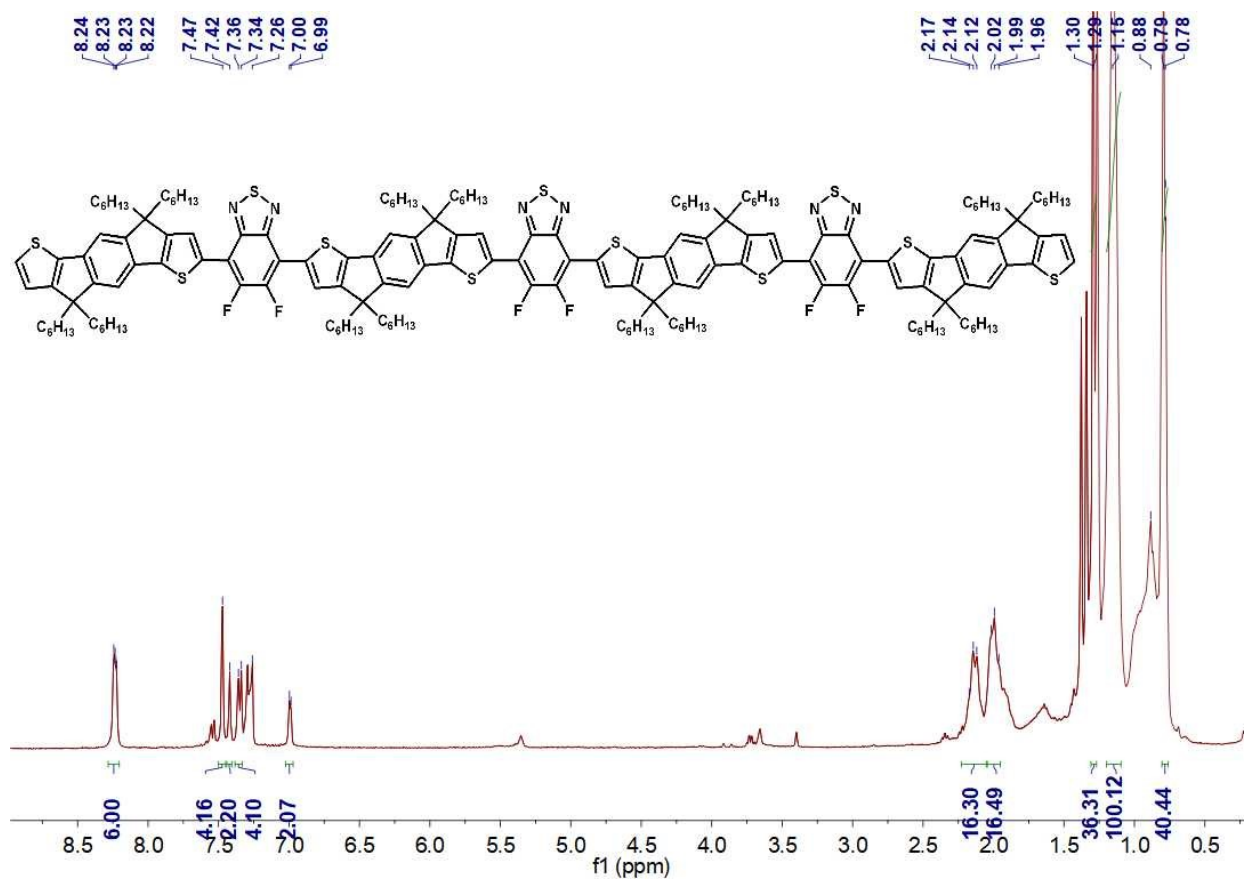

Fig. S14 <sup>1</sup>H NMR spectra of alt-(IDT-DFBT)-3 in CDCl<sub>3</sub>.

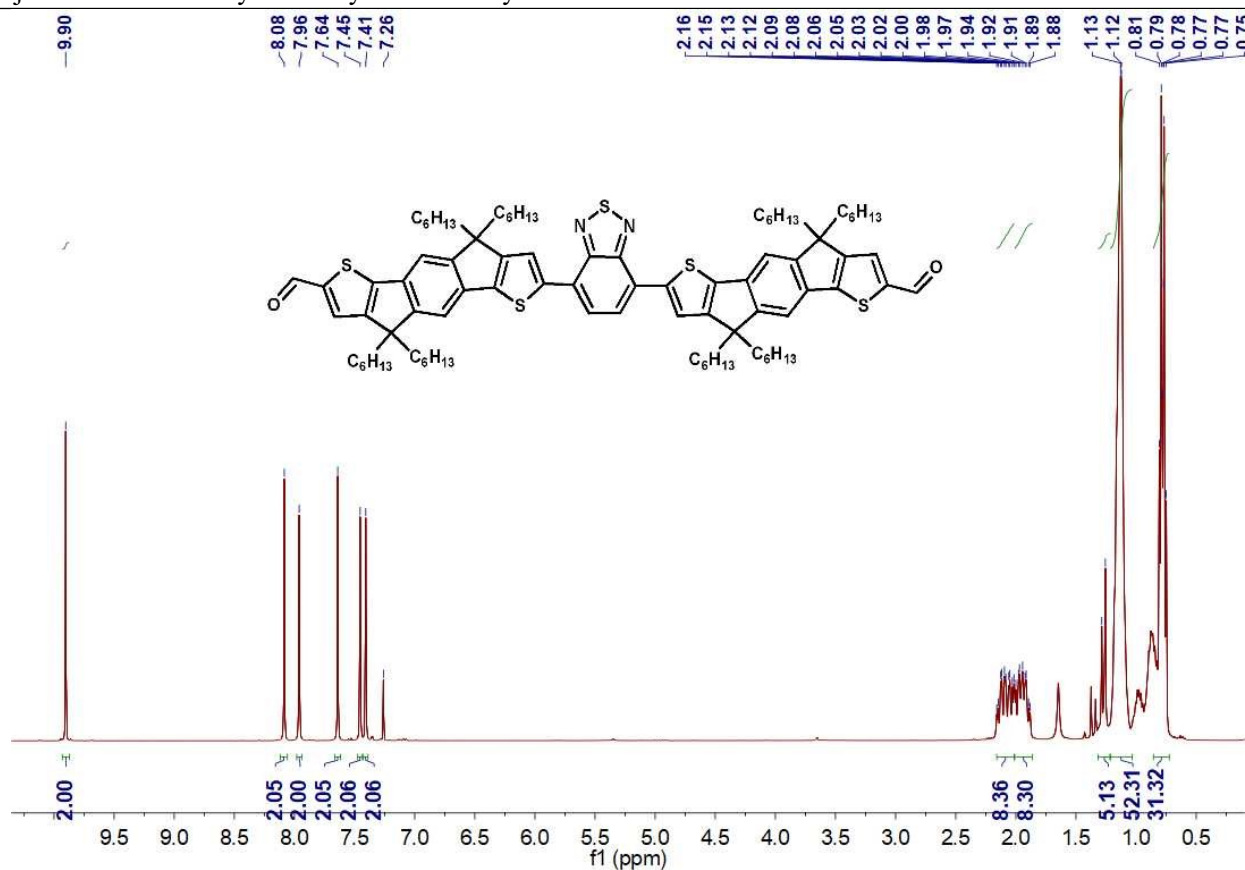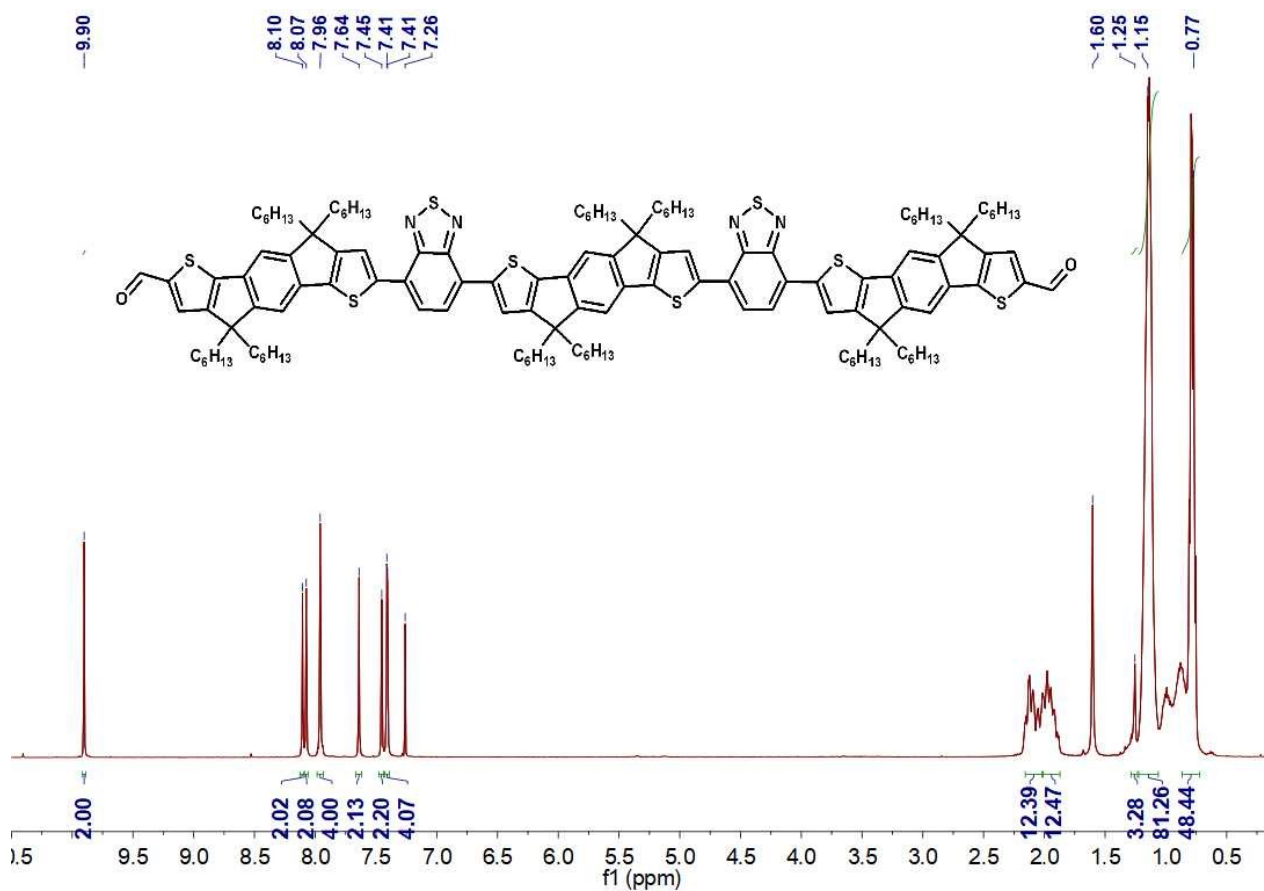

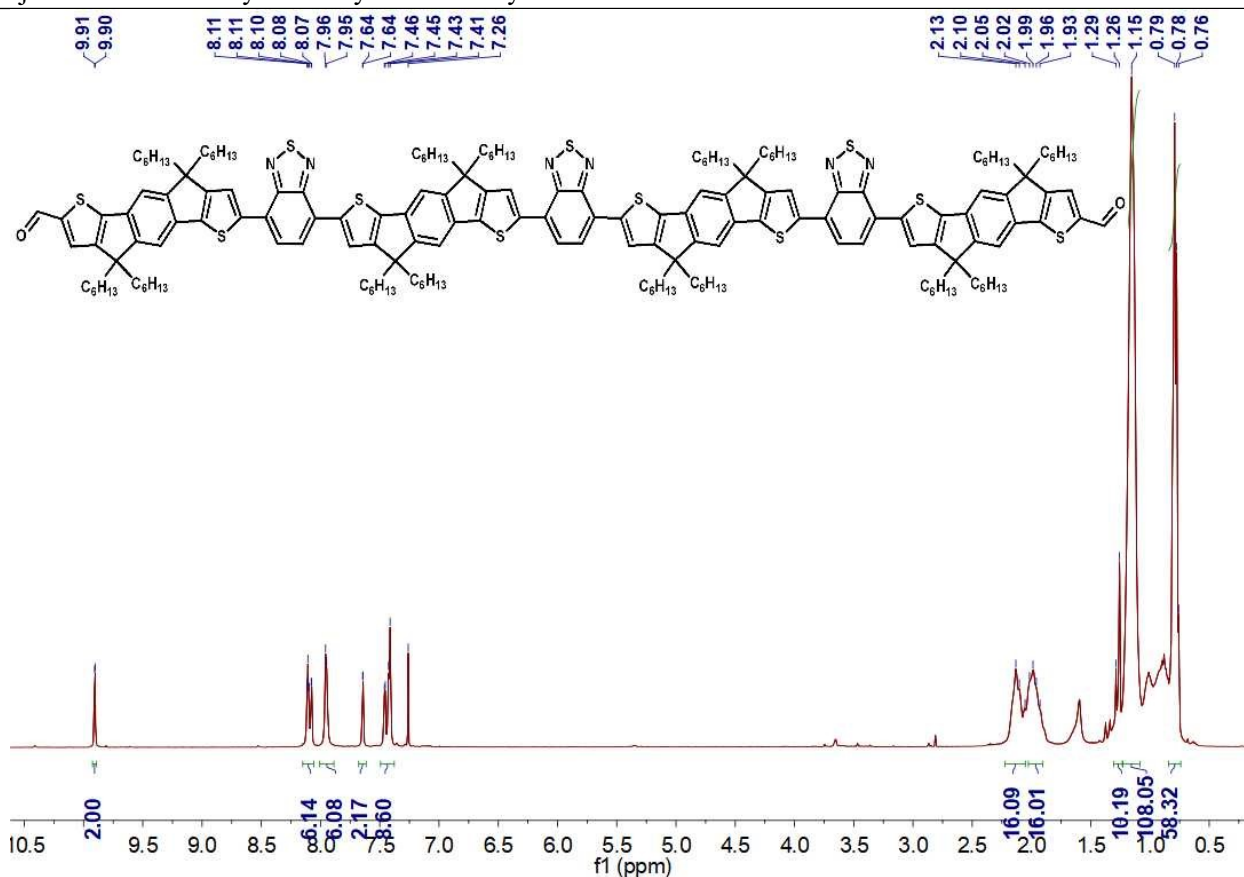

Fig. S17 <sup>1</sup>H NMR spectra of aldehyde intermediate 1c in CDCl<sub>3</sub>.

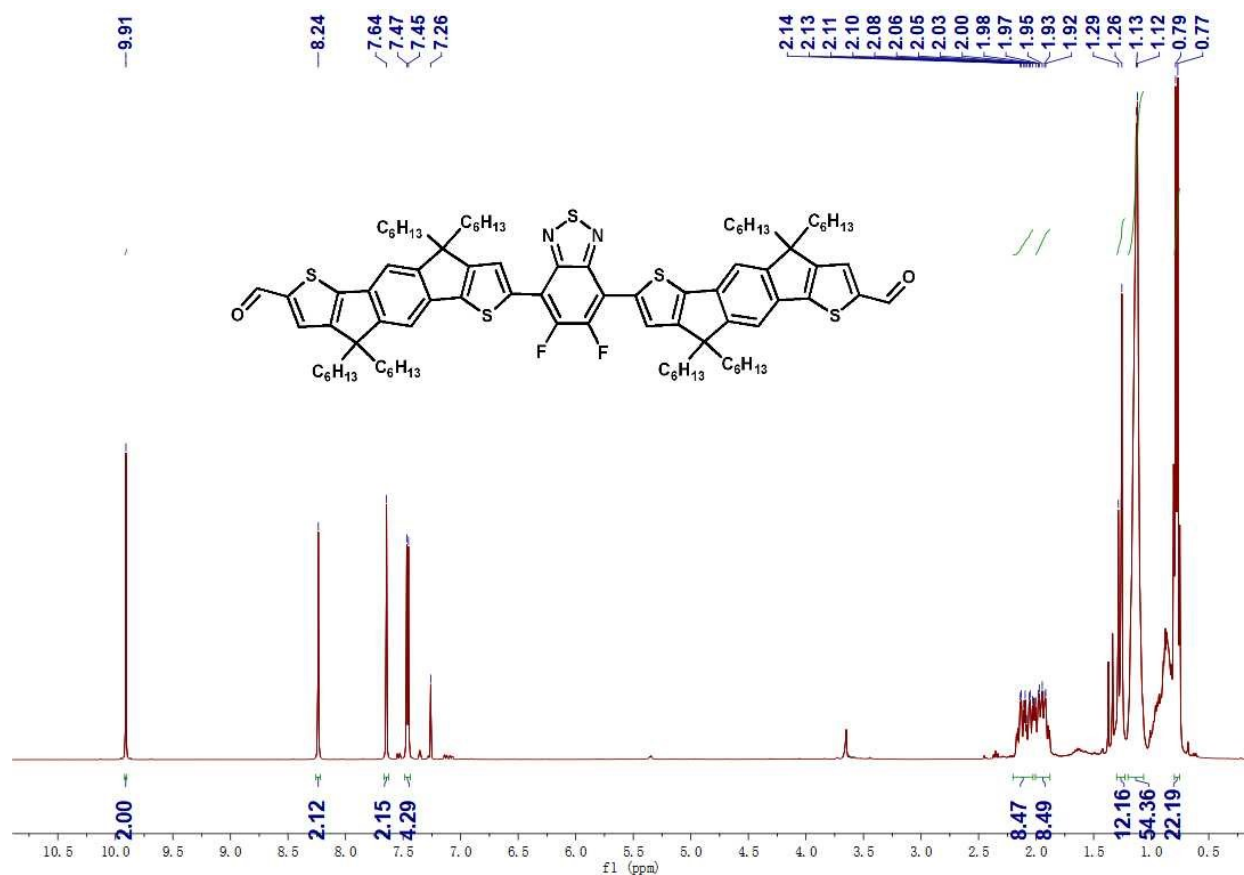

Fig. S18 <sup>1</sup>H NMR spectra of aldehyde intermediate 2a in CDCl<sub>3</sub>.



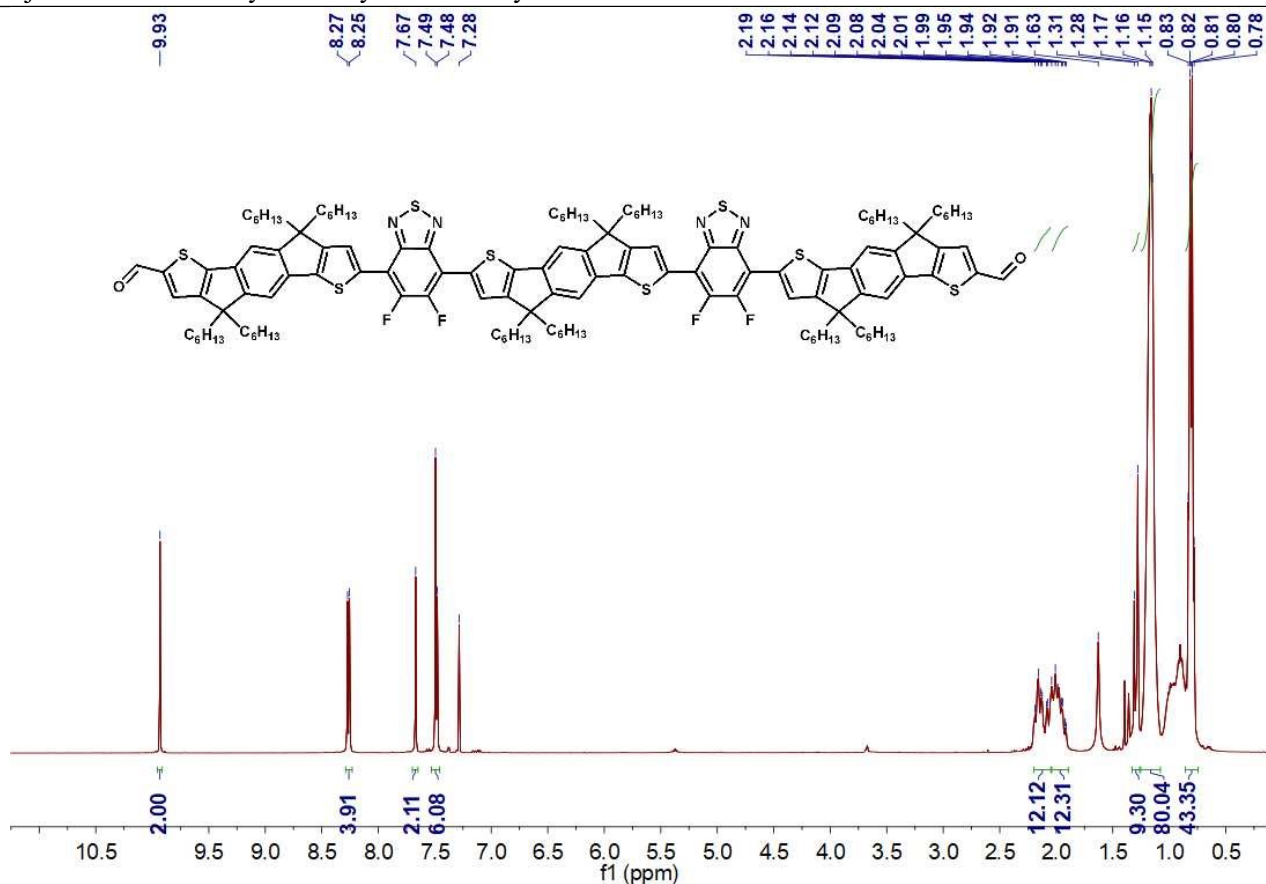

Fig. S19  $^1\text{H}$  NMR spectra of aldehyde intermediate 2b in  $\text{CDCl}_3$ .

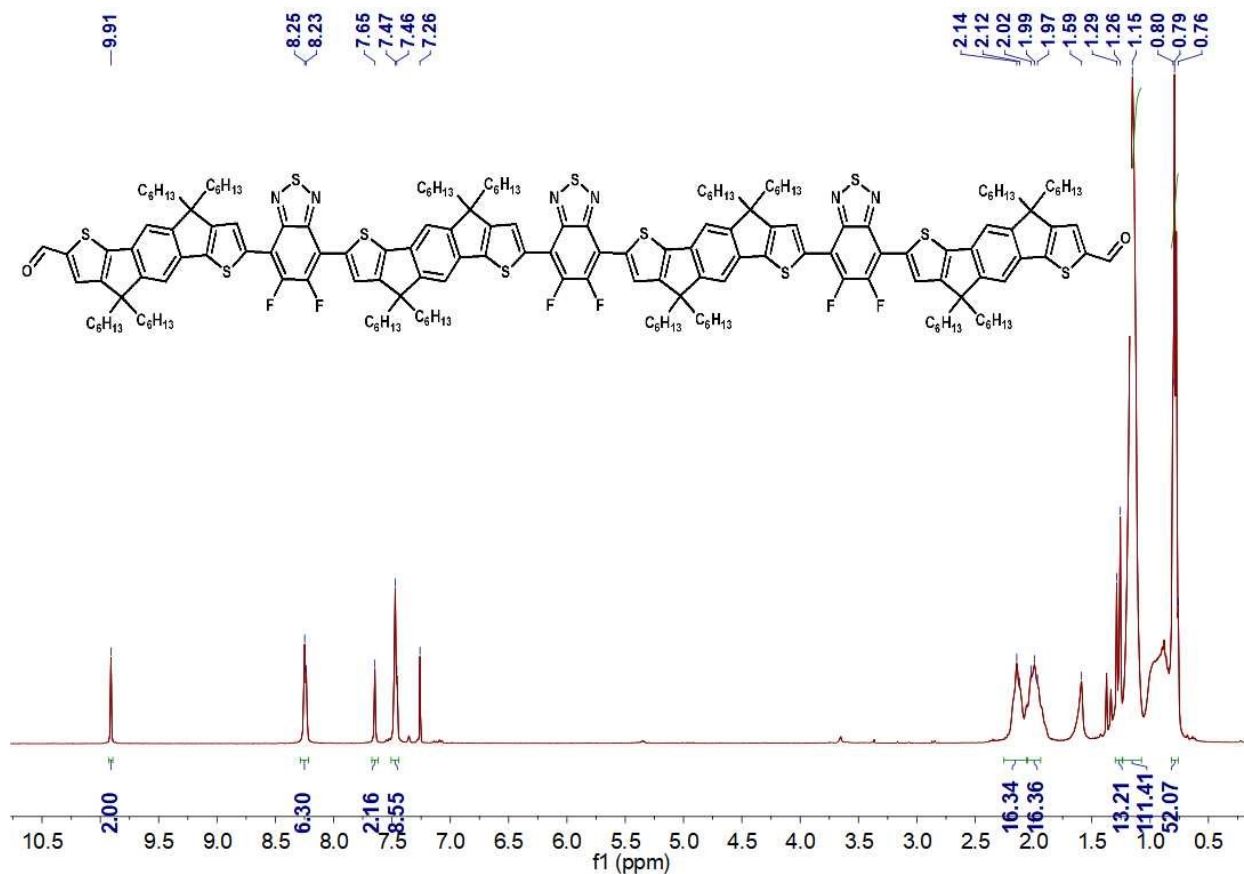

Fig. S20  $^1\text{H}$  NMR spectra of aldehyde intermediate 2c in  $\text{CDCl}_3$ .



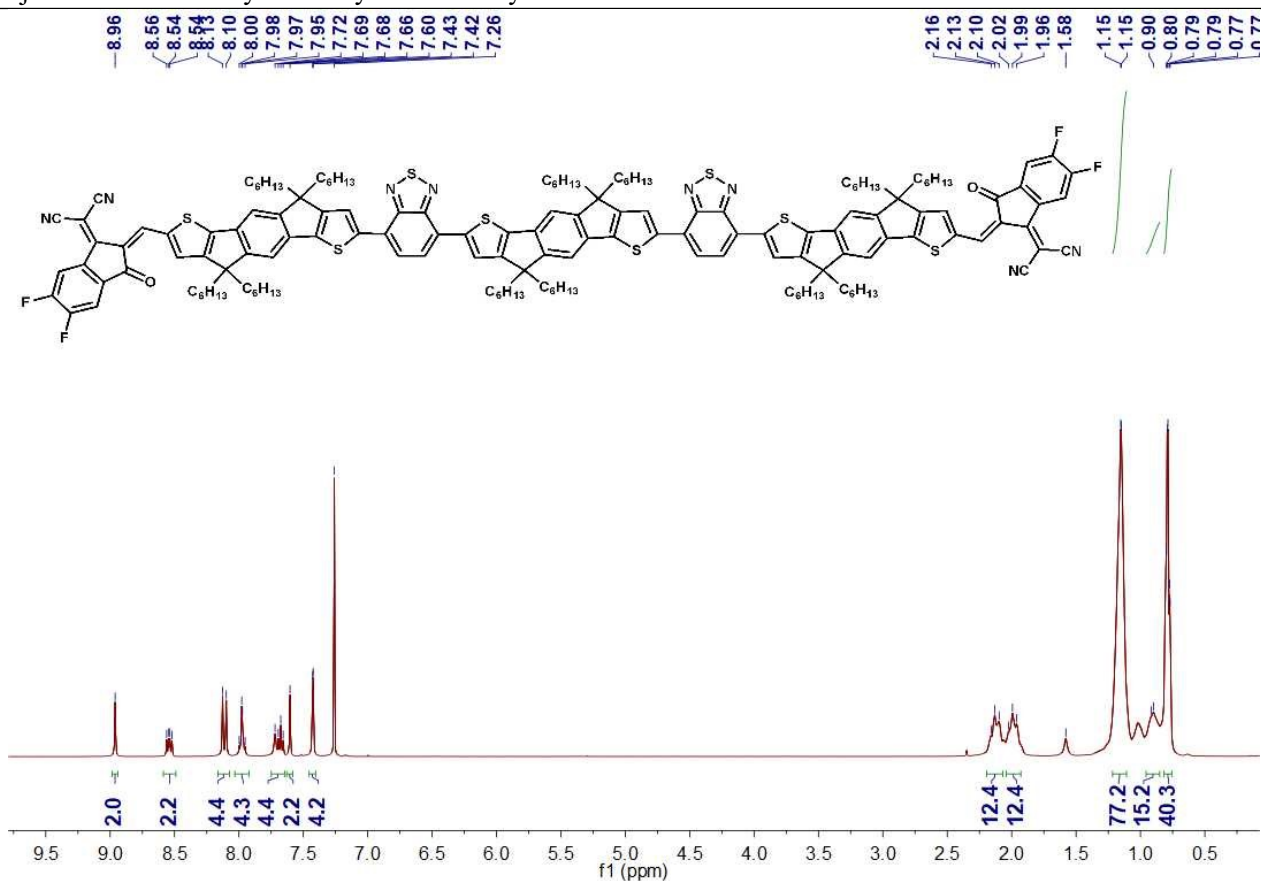

Fig. S23 <sup>1</sup>H NMR spectra of IDB-IC-2 in CDCl<sub>3</sub>.

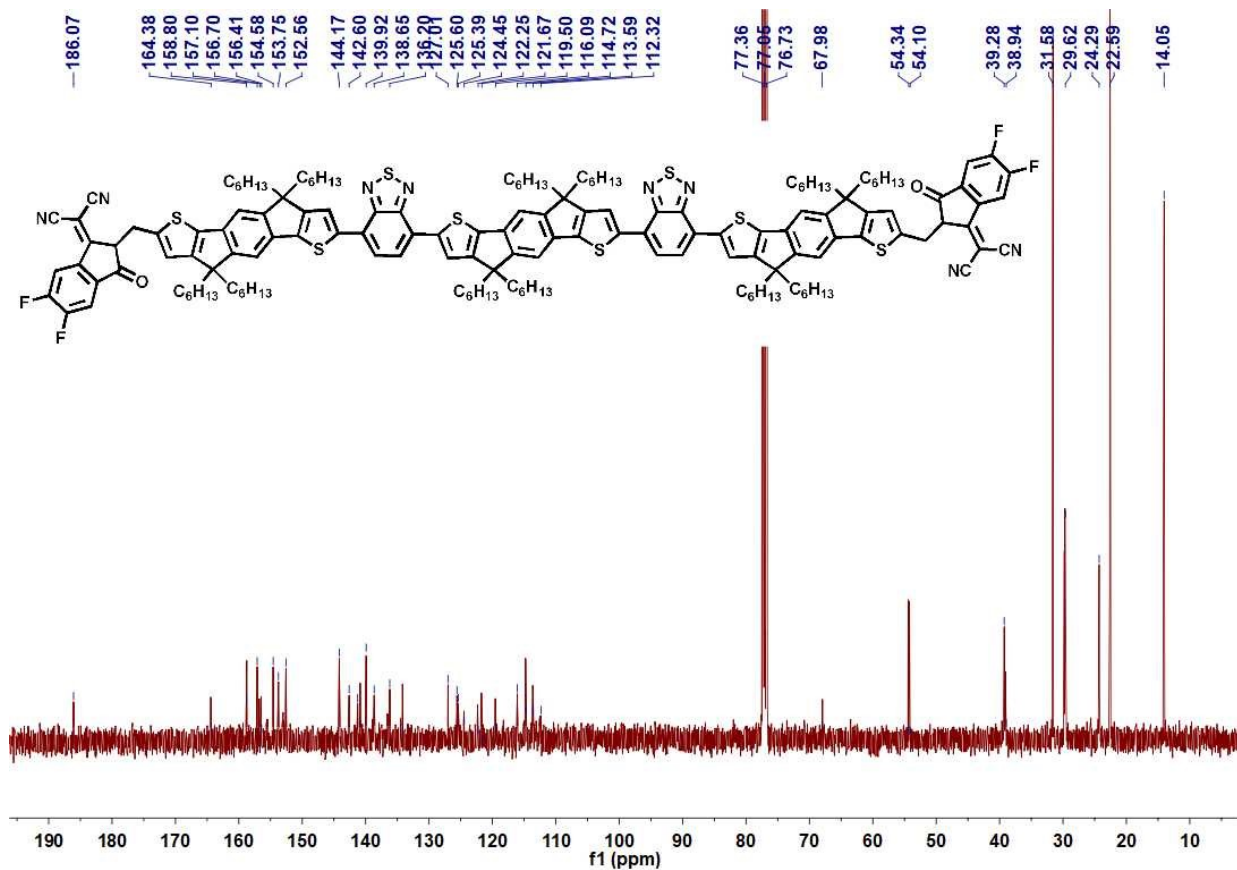

Fig. S24 <sup>13</sup>C NMR spectra of IDB-IC-2 in CDCl<sub>3</sub>.



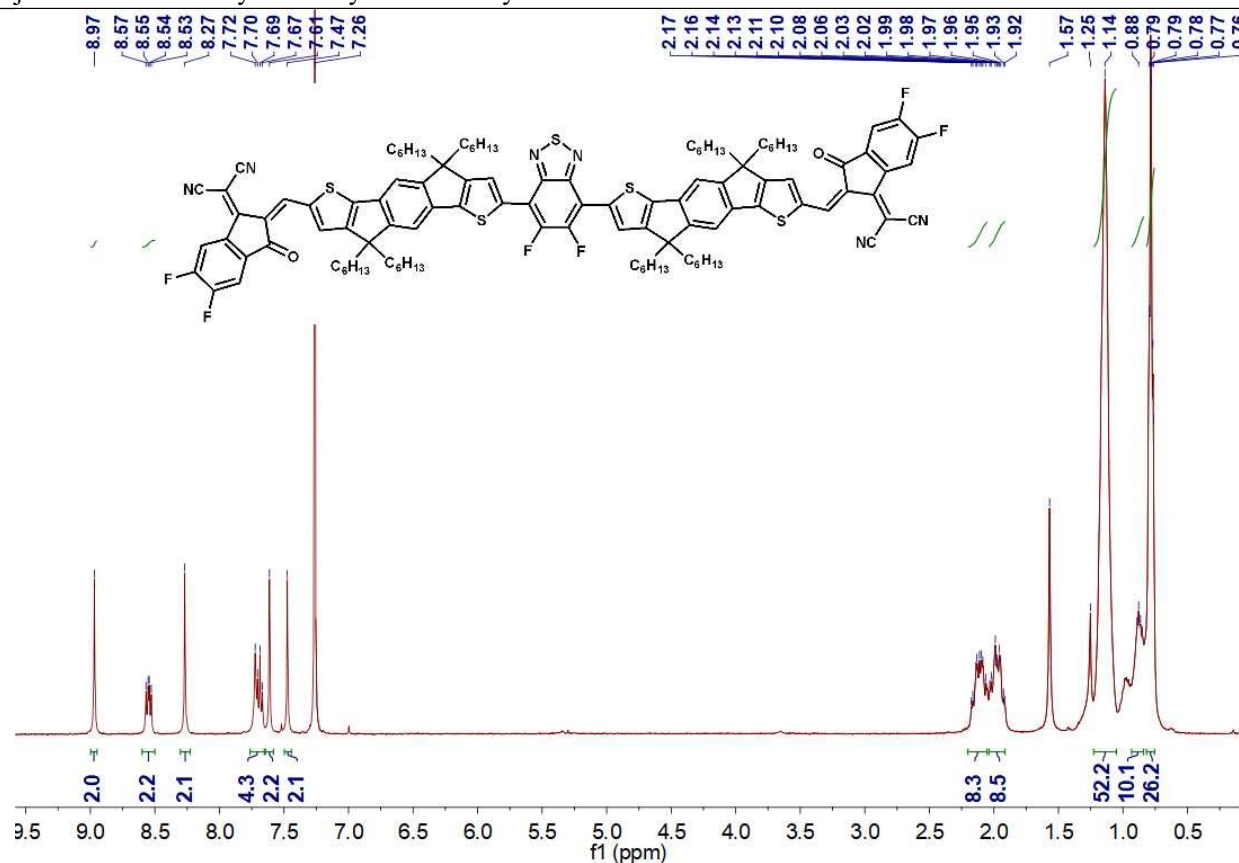

Fig. S27 <sup>1</sup>H NMR spectra of IDBF-IC-1 in CDCl<sub>3</sub>.

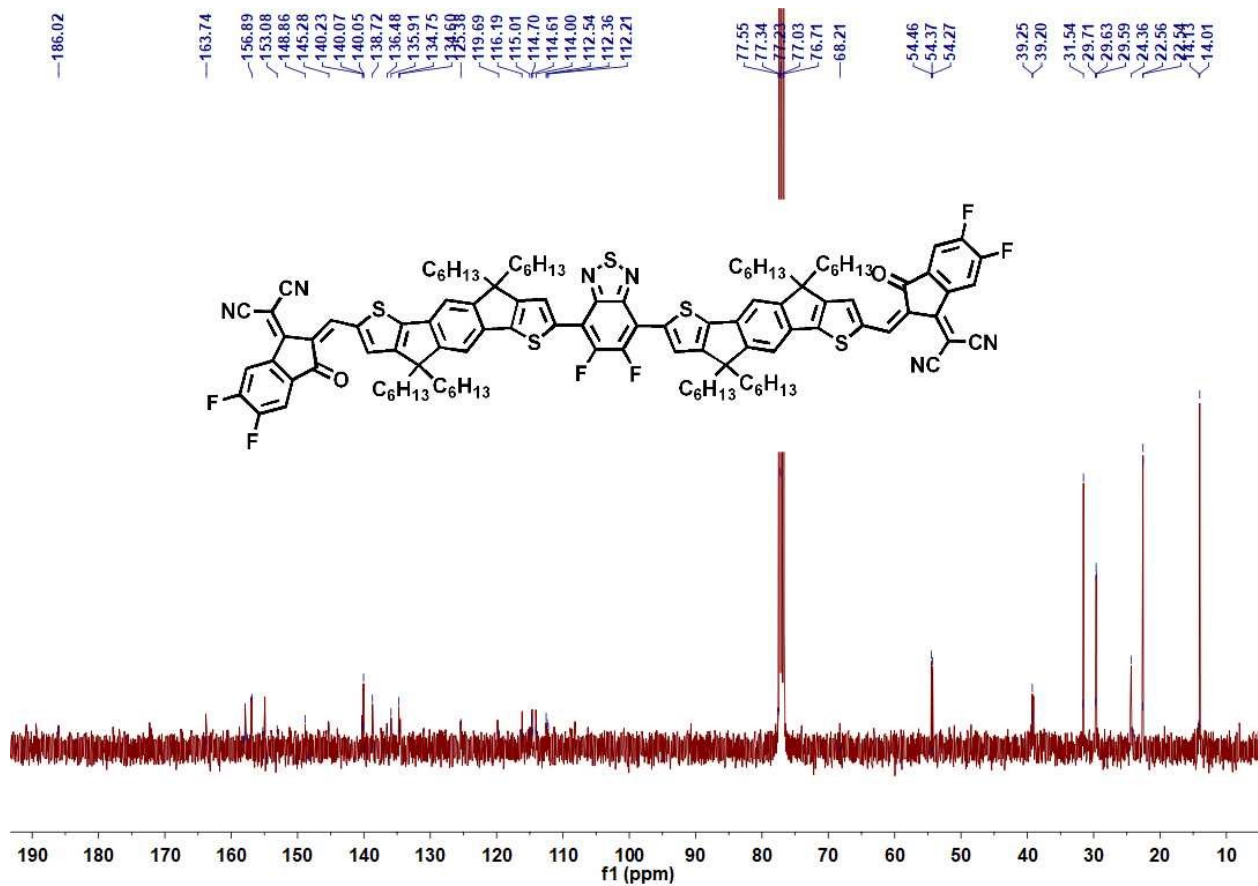

Fig. S28 <sup>13</sup>C NMR spectra of IDBF-IC-1 in CDCl<sub>3</sub>.

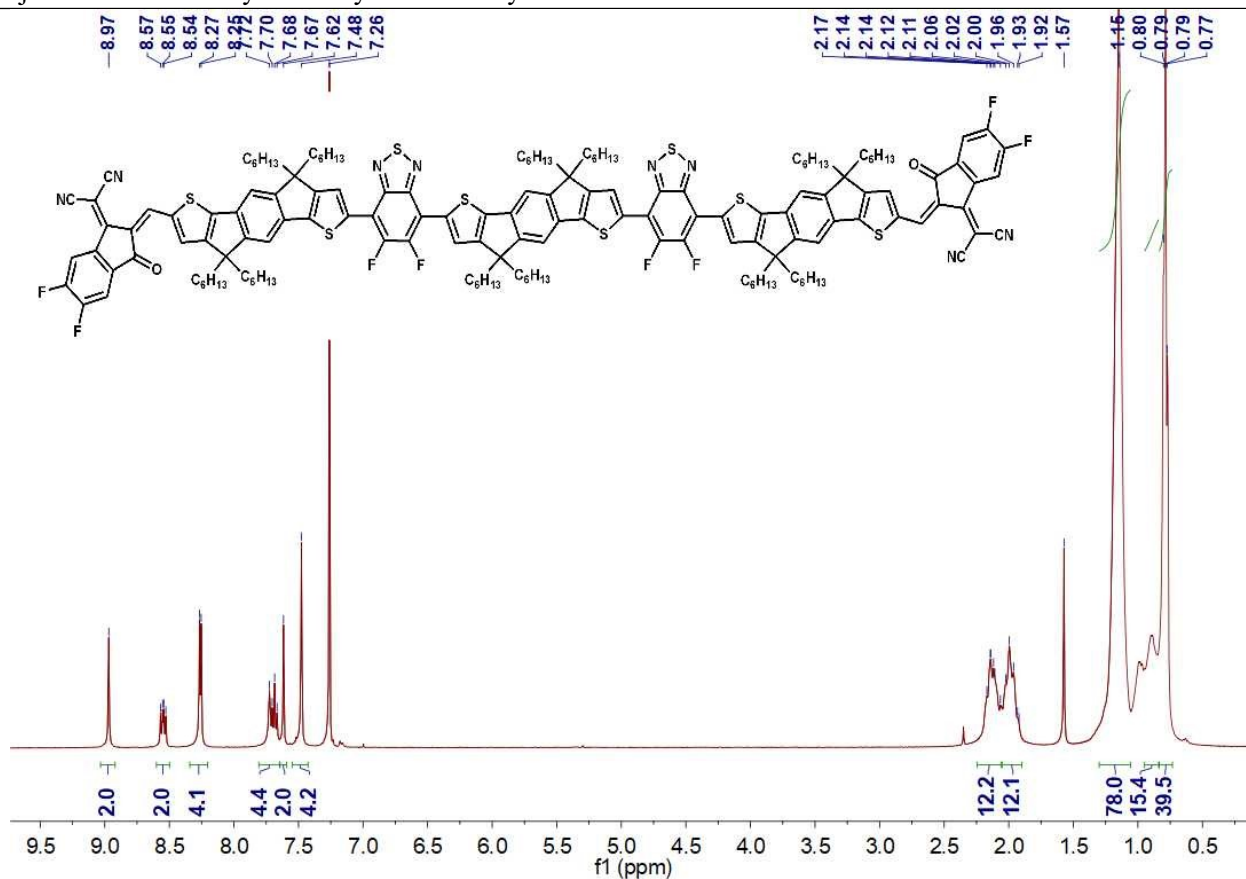

**Fig. S29**  $^1\text{H}$  NMR spectra of IDBF-IC-2 in  $\text{CDCl}_3$ .

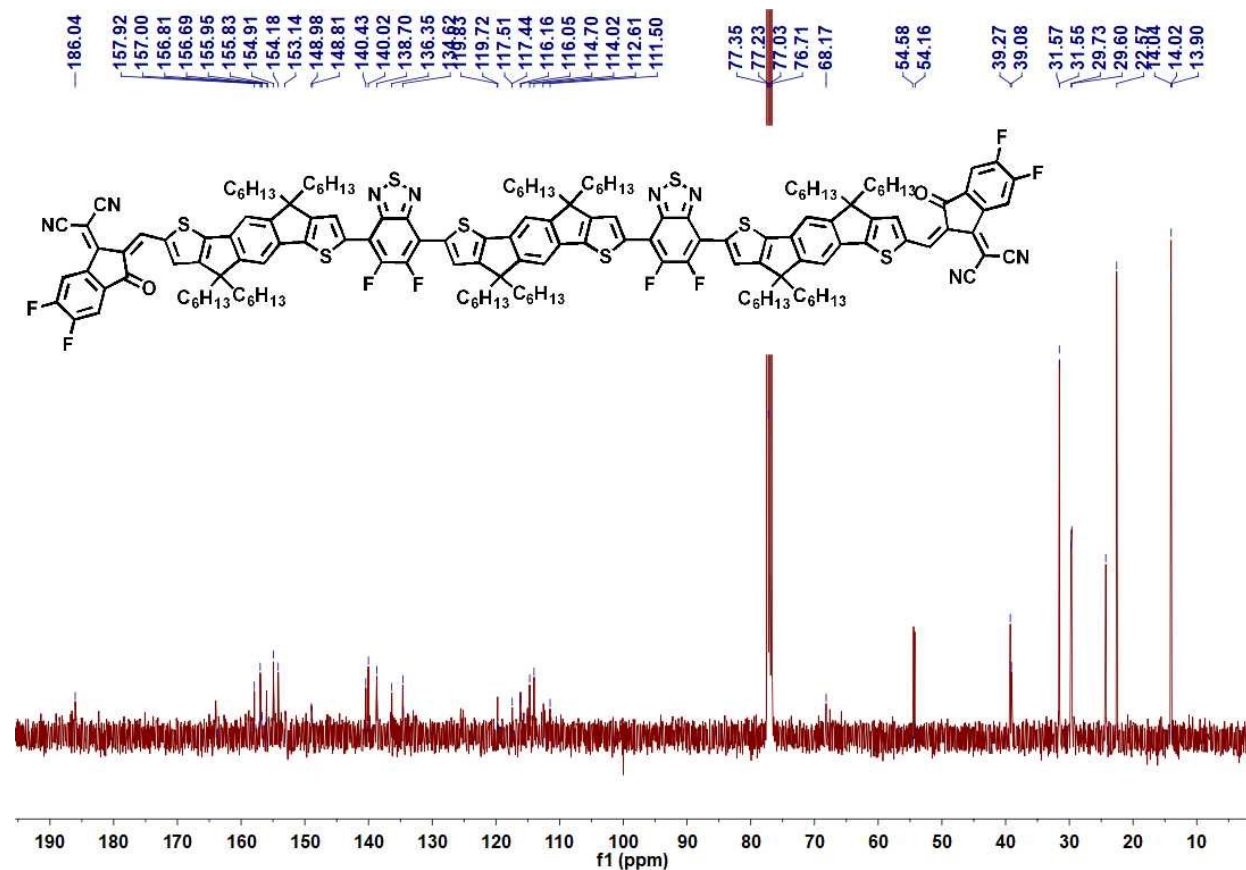

**Fig. S30**  $^{13}\text{C}$  NMR spectra of IDBF-IC-2 in  $\text{CDCl}_3$ .

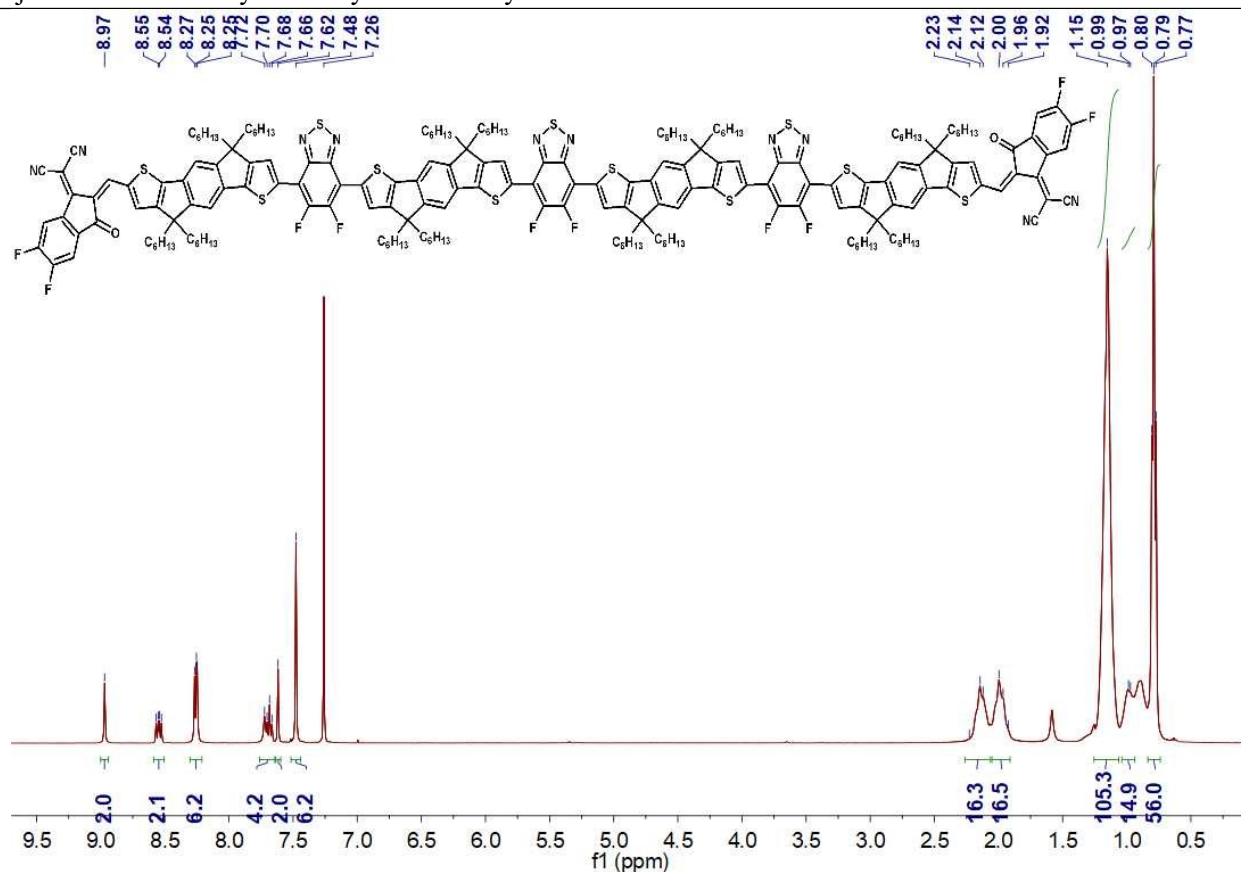

Fig. S31 <sup>1</sup>H NMR spectra of IDBF-IC-3 in CDCl<sub>3</sub>.

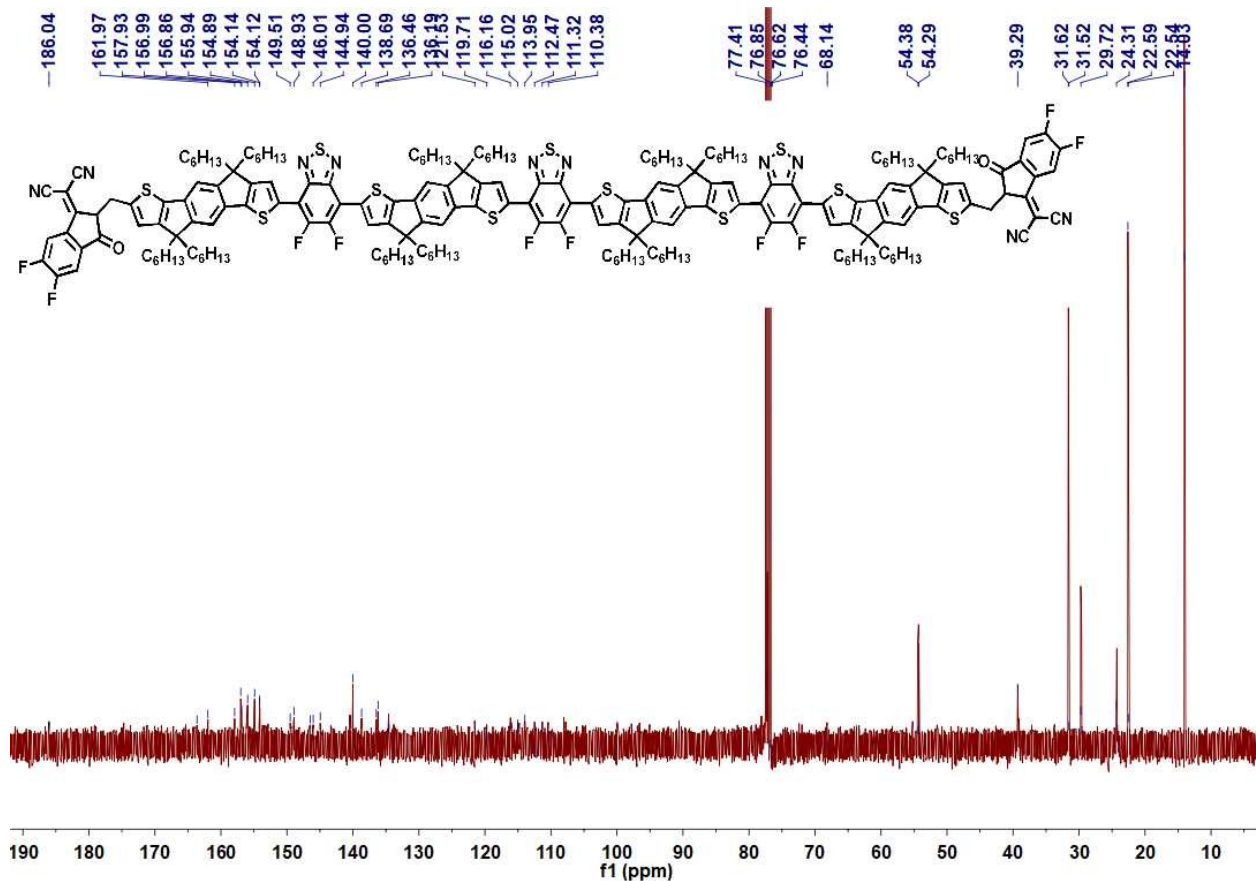

Fig. S32 <sup>13</sup>C NMR spectra of IDBF-IC-3 in CDCl<sub>3</sub>.

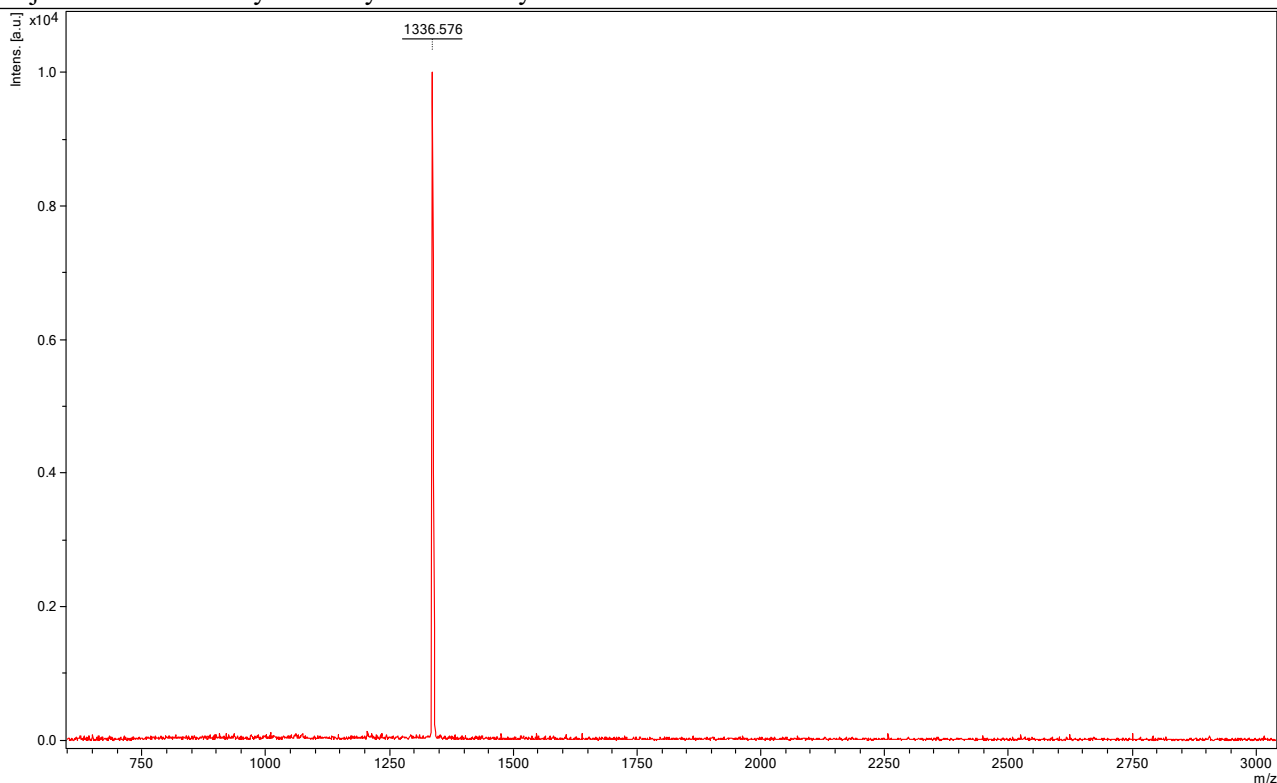

**Fig. S33** MALDI-TOF MS spectrum of alt-(IDT-BT)-1, calcd. 1336.774, found 1136.576.

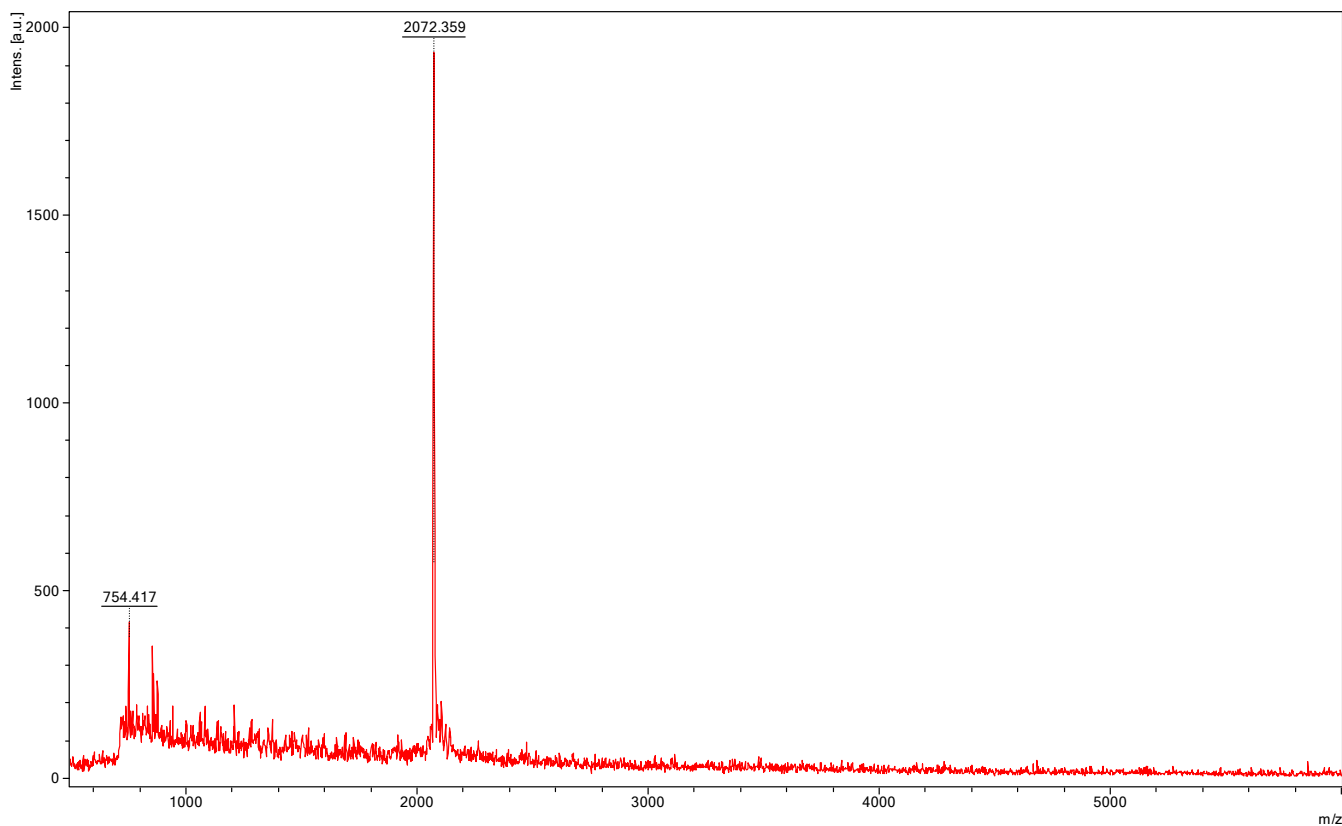

**Fig. S34** MALDI-TOF MS spectrum of alt-(IDT-BT)-2, calcd. 2072.154, found 2071.359.



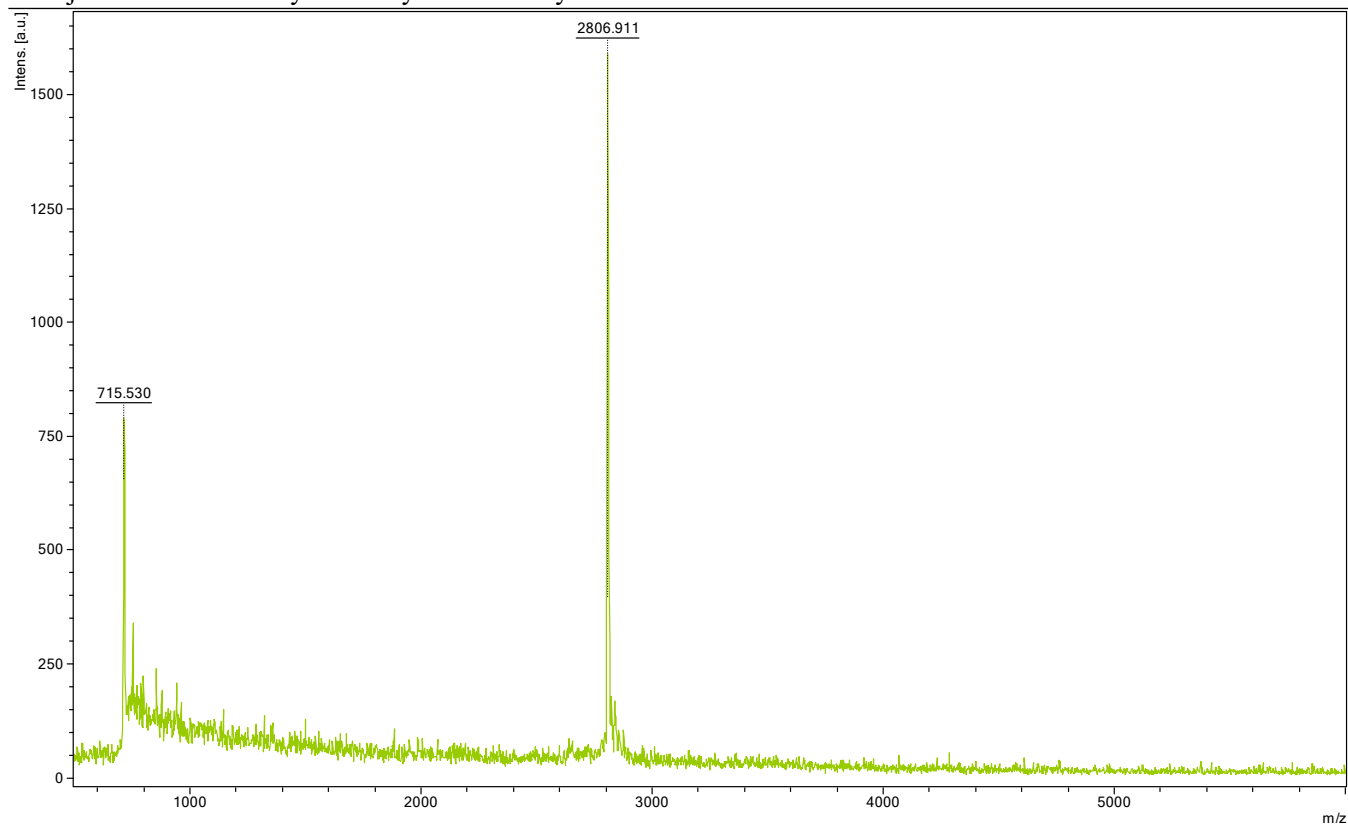

**Fig. S35** MALDI-TOF MS spectrum of alt-(IDT-BT)-3, calcd. 2806.530, found 2806.911.

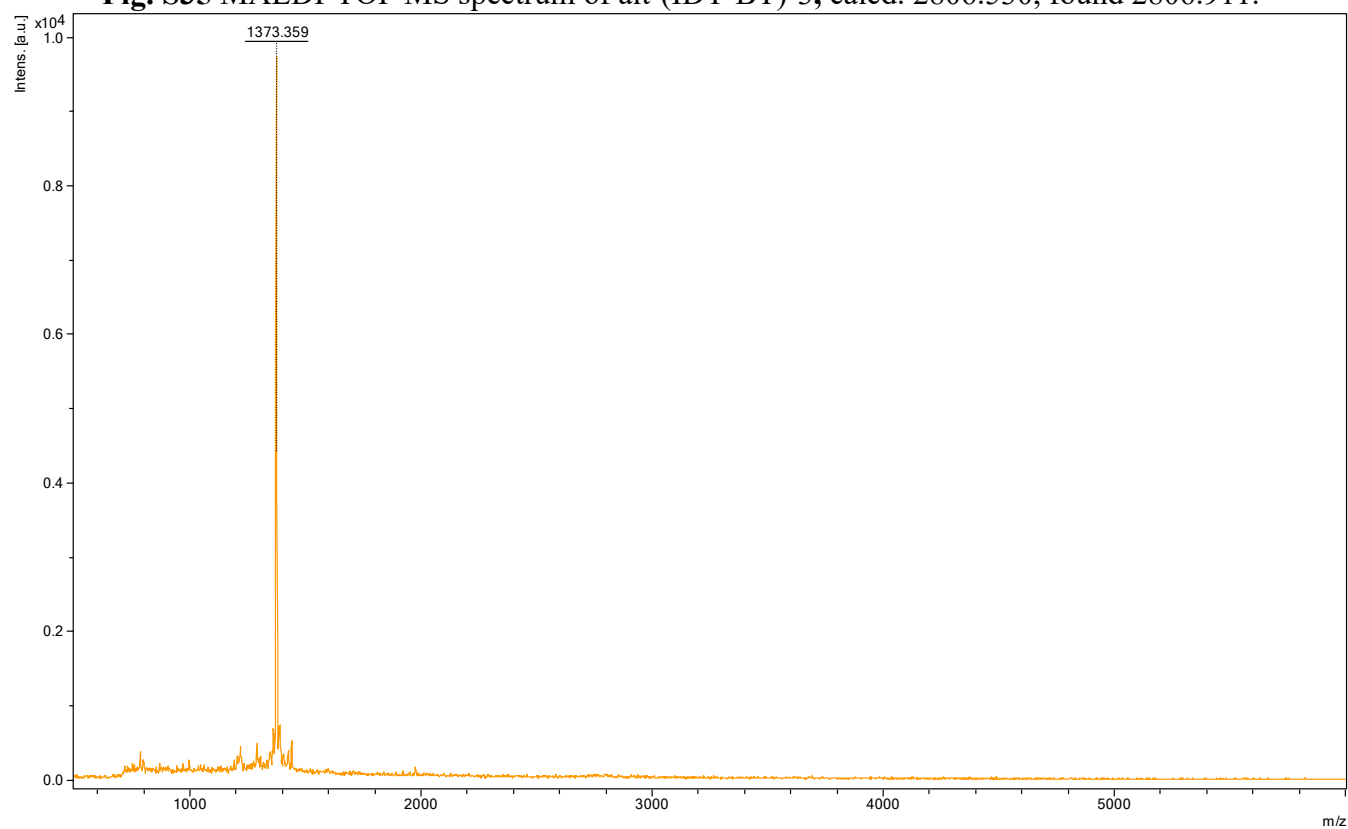

**Fig. S36** MALDI-TOF MS spectrum of alt-(IDT-DFBT)-1, calcd. 1372.755, found 1373.359.

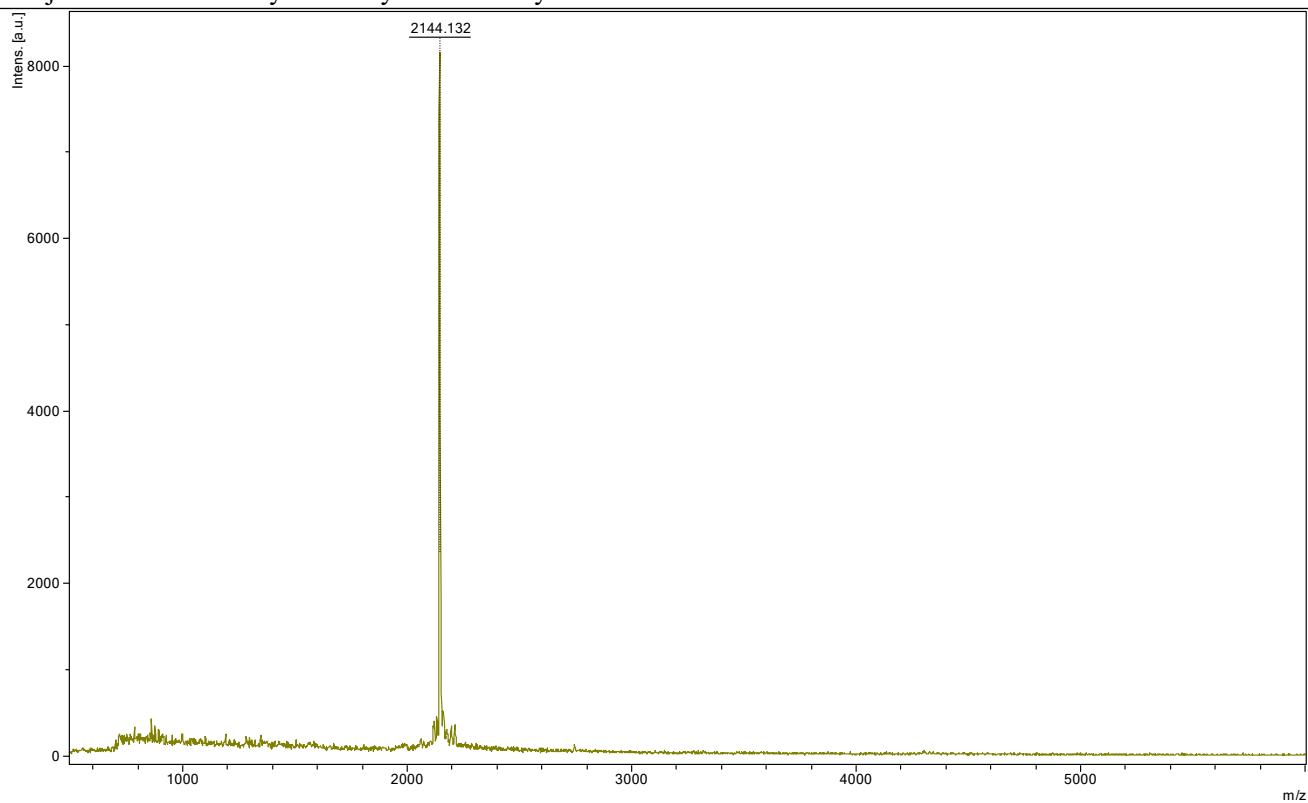

**Fig. S37** MALDI-TOF MS spectrum of alt-(IDT-DFBT)-2, calcd. 2144.116, found 2144.132.

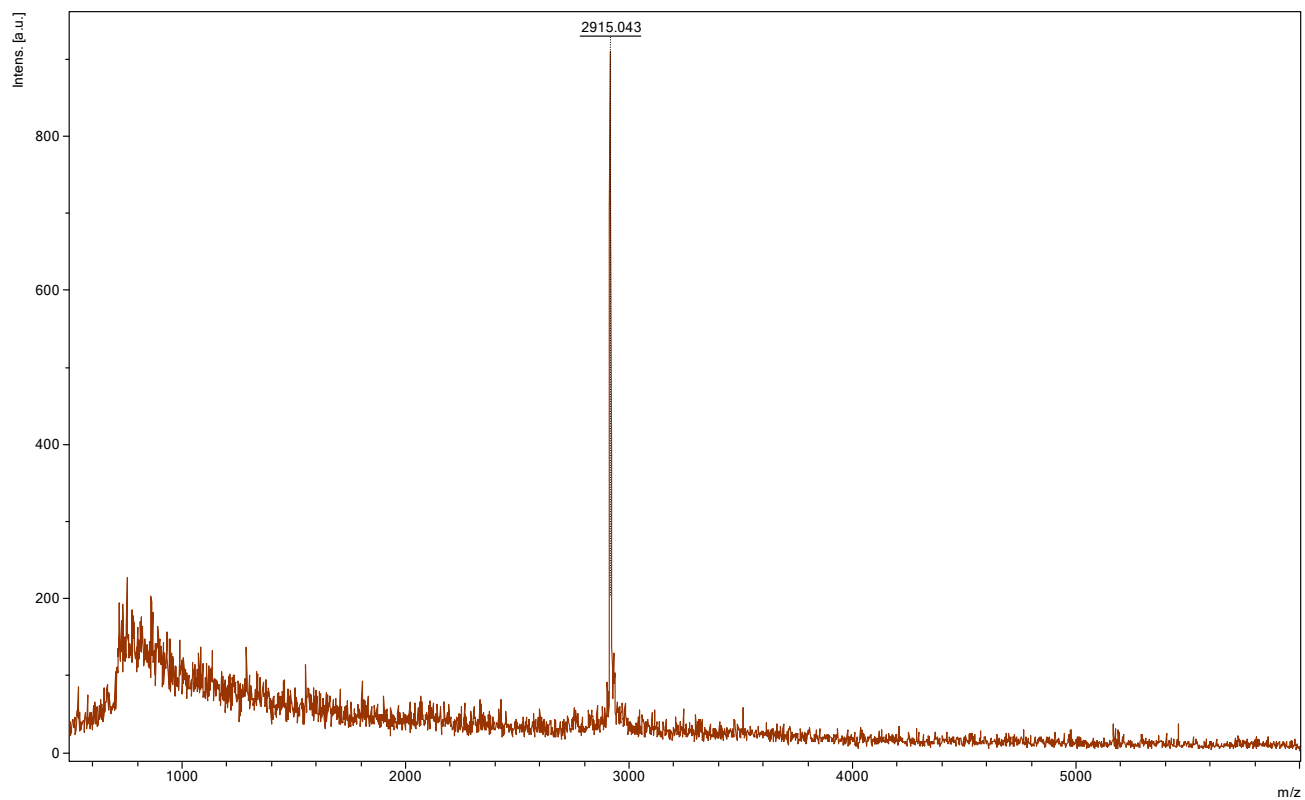

**Fig. S38** MALDI-TOF MS spectrum of alt-(IDT-BT)-1, calcd. 2914.473, found 2915.043.

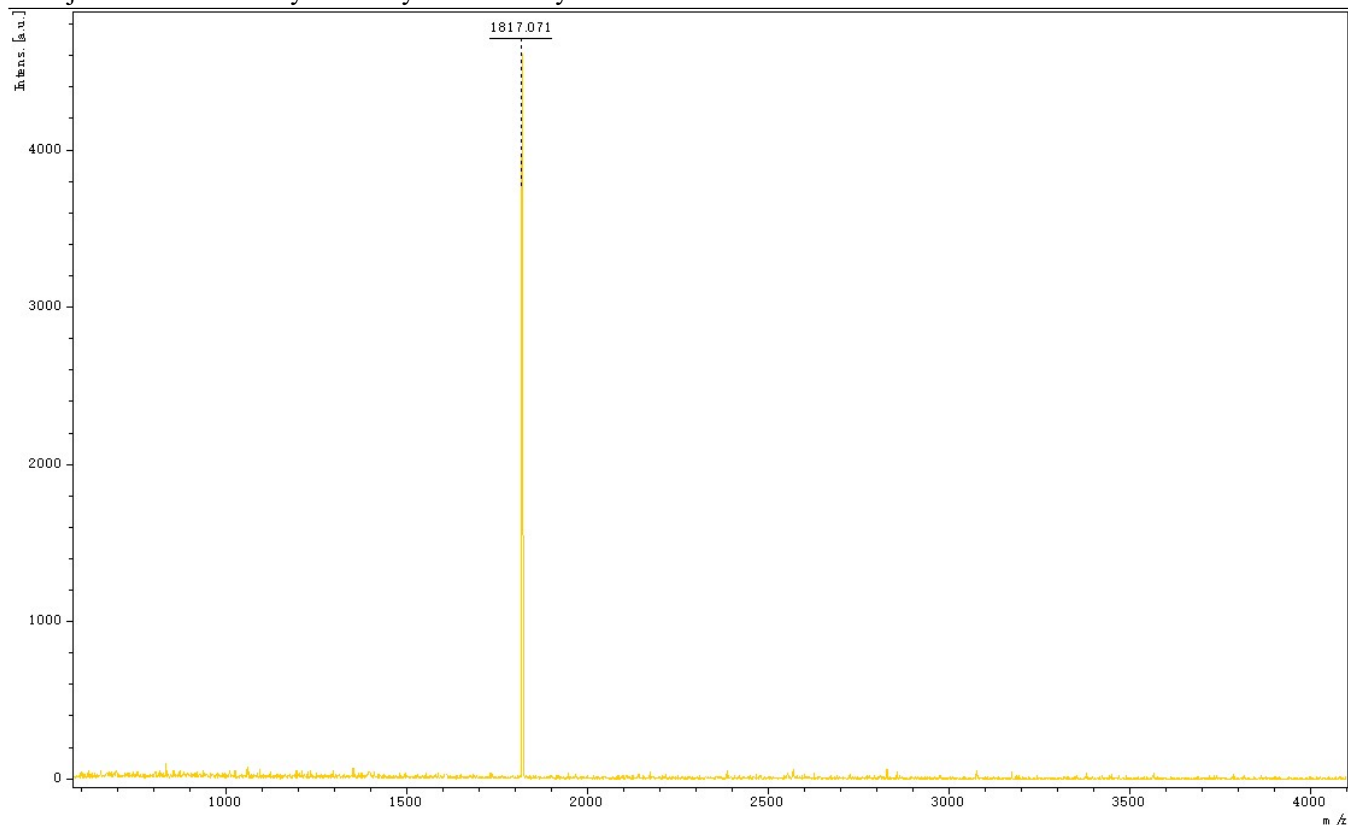

**Fig. S39** MALDI-TOF MS spectrum of IDB-IC-1, calcd. 1817.804, found 1817.071.

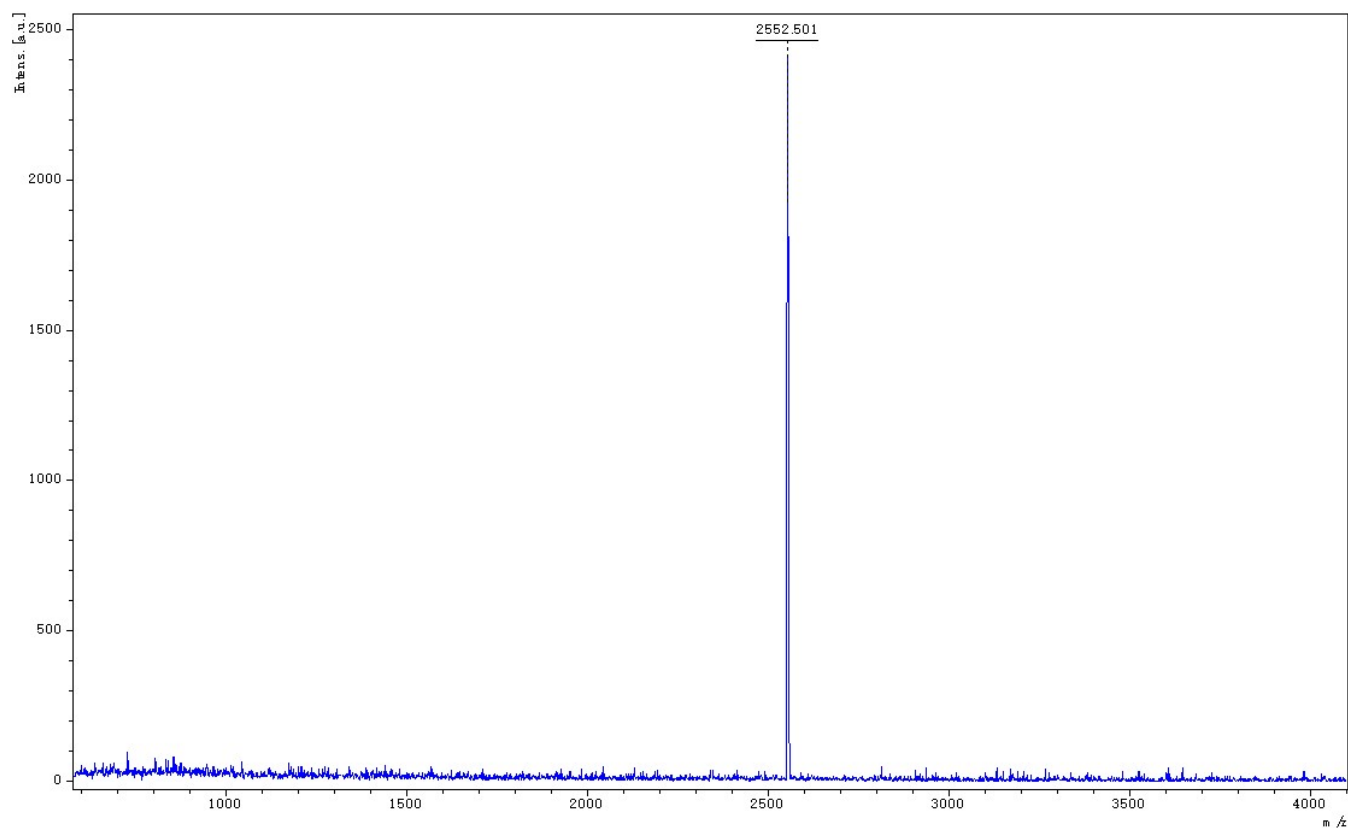

**Fig. S40** MALDI-TOF MS spectrum of IDB-IC-2, calcd. 2552.181, found 2552.501.

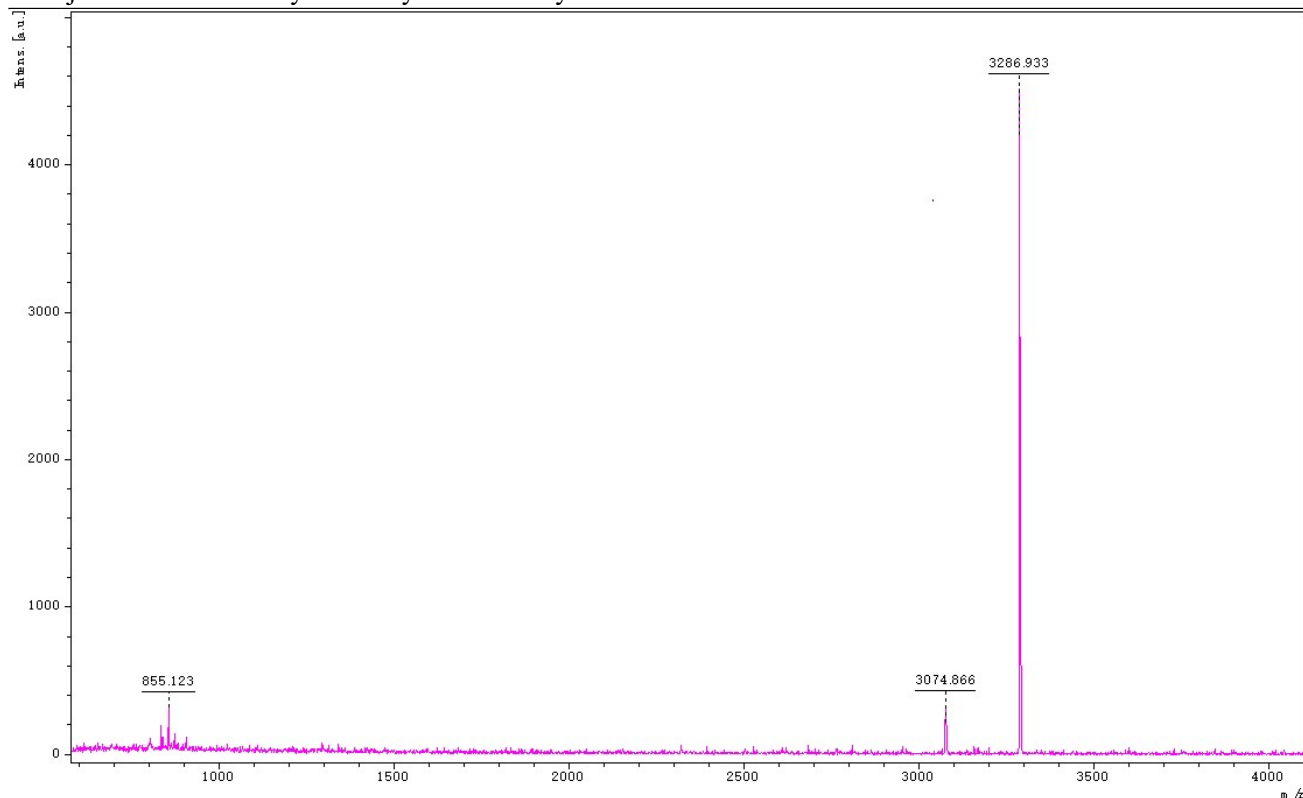

**Fig. S41** MALDI-TOF MS spectrum of IDB-IC-3, calcd. 3287.56,0 found 3286.933.

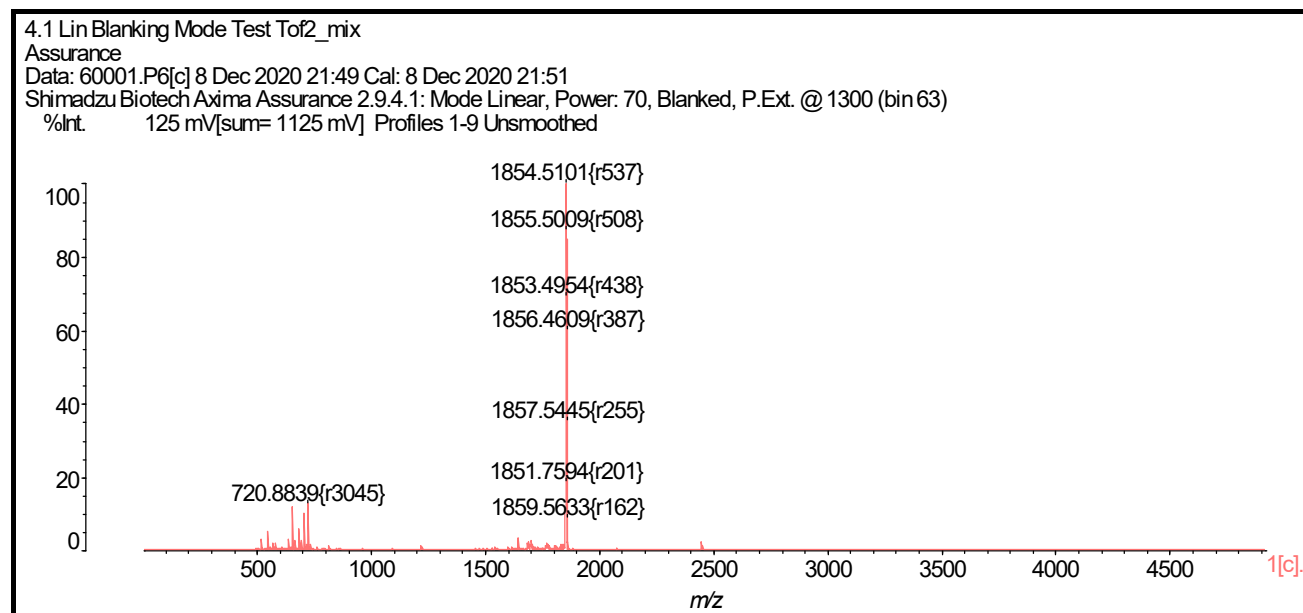

**Fig. S42** MALDI-TOF MS spectrum of IDBF-IC-1, calcd. 1854.5064, found 1854.5101.

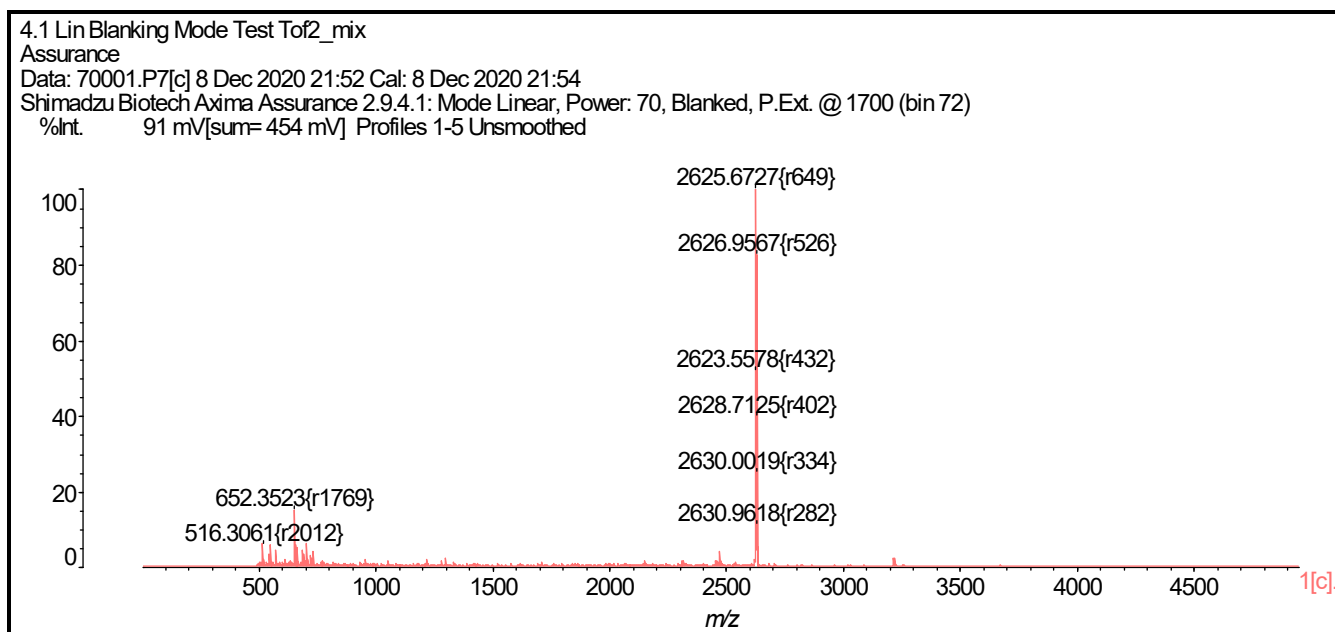

**Fig. S43** MALDI-TOF MS spectrum of IDBF-IC-2, calcd. 2625.6512, found 2625.6727.

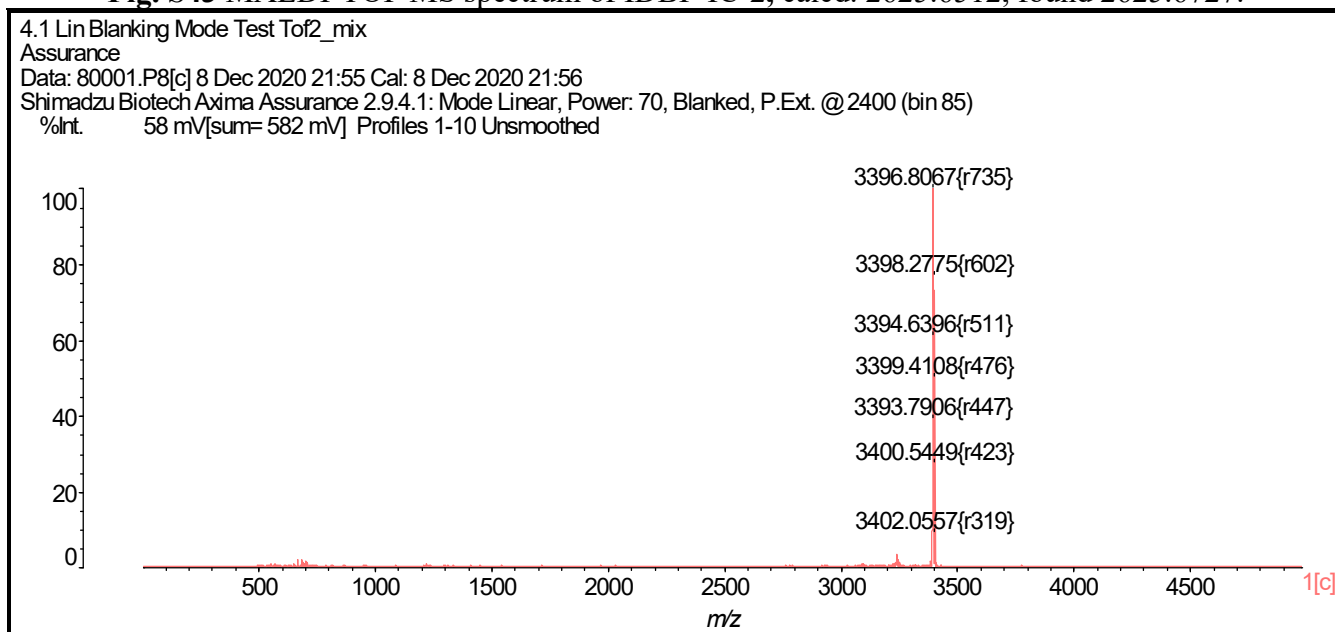

**Fig. S44** MALDI-TOF MS spectrum of IDBF-IC-3, calcd. 3396.7960, found 3396.8067.
